# Supplementary material
Source: PubMed Central journal article supplement (PMC10718382)

1 **Supplemental Data**

2

3 **Table of Contents**

4

|    |                                   |    |
|----|-----------------------------------|----|
| 5  | Supplemental Data 1 .....         | 2  |
| 6  | Supplemental Data 2 .....         | 3  |
| 7  | Supplemental Data 3 .....         | 3  |
| 8  | Supplemental Data 4 .....         | 3  |
| 9  | Table S1 .....                    | 4  |
| 10 | Table S2 .....                    | 4  |
| 11 | Table S3 .....                    | 6  |
| 12 | Table S4 .....                    | 7  |
| 13 | Table S5 .....                    | 8  |
| 14 | Table S6 .....                    | 10 |
| 15 | Table S7 .....                    | 10 |
| 16 | Table S8 .....                    | 13 |
| 17 | Table S9 .....                    | 14 |
| 18 | Table S10 .....                   | 14 |
| 19 | Table S11 .....                   | 15 |
| 20 | Table S12 .....                   | 15 |
| 21 | Table S13 .....                   | 15 |
| 22 | Table S14 .....                   | 16 |
| 23 | Table S15 .....                   | 16 |
| 24 | Table S16 .....                   | 16 |
| 25 | Table S17 .....                   | 19 |
| 26 | Supplemental Figure Legends ..... | 20 |
| 27 | Figure S1 .....                   | 21 |
| 28 | Figure S2 .....                   | 22 |
| 29 | Figure S3 .....                   | 23 |
| 30 | Figure S4.....                    | 24 |

31 **Supplemental Data 1: TRIPOD checklist for prediction model validation**

| Section/Topic                |     | Checklist Item                                                                                                                                                                                        | Page     |
|------------------------------|-----|-------------------------------------------------------------------------------------------------------------------------------------------------------------------------------------------------------|----------|
| <b>Title and abstract</b>    |     |                                                                                                                                                                                                       |          |
| Title                        | 1   | Identify the study as developing and/or validating a multivariable prediction model, the target population, and the outcome to be predicted.                                                          | 1        |
| Abstract                     | 2   | Provide a summary of objectives, study design, setting, participants, sample size, predictors, outcome, statistical analysis, results, and conclusions.                                               | 2        |
| <b>Introduction</b>          |     |                                                                                                                                                                                                       |          |
| Background and objectives    | 3a  | Explain the medical context (including whether diagnostic or prognostic) and rationale for developing or validating the multivariable prediction model, including references to existing models.      | 3-4      |
|                              | 3b  | Specify the objectives, including whether the study describes the development or validation of the model or both.                                                                                     | 3-4      |
| <b>Methods</b>               |     |                                                                                                                                                                                                       |          |
| Source of data               | 4a  | Describe the study design or source of data (e.g., randomized trial, cohort, or registry data), separately for the development and validation data sets, if applicable.                               | 5        |
|                              | 4b  | Specify the key study dates, including start of accrual; end of accrual; and, if applicable, end of follow-up.                                                                                        | 5        |
| Participants                 | 5a  | Specify key elements of the study setting (e.g., primary care, secondary care, general population) including number and location of centres.                                                          | 5        |
|                              | 5b  | Describe eligibility criteria for participants.                                                                                                                                                       | 5        |
|                              | 5c  | Give details of treatments received, if relevant.                                                                                                                                                     | NA       |
| Outcome                      | 6a  | Clearly define the outcome that is predicted by the prediction model, including how and when assessed.                                                                                                | 5        |
|                              | 6b  | Report any actions to blind assessment of the outcome to be predicted.                                                                                                                                | NA       |
| Predictors                   | 7a  | Clearly define all predictors used in developing or validating the multivariable prediction model, including how and when they were measured.                                                         | 5        |
|                              | 7b  | Report any actions to blind assessment of predictors for the outcome and other predictors.                                                                                                            | NA       |
| Sample size                  | 8   | Explain how the study size was arrived at.                                                                                                                                                            | 5        |
| Missing data                 | 9   | Describe how missing data were handled (e.g., complete-case analysis, single imputation, multiple imputation) with details of any imputation method.                                                  | 5        |
| Statistical analysis methods | 10c | For validation, describe how the predictions were calculated.                                                                                                                                         | 6-7      |
|                              | 10d | Specify all measures used to assess model performance and, if relevant, to compare multiple models.                                                                                                   | 6-7      |
|                              | 10e | Describe any model updating (e.g., recalibration) arising from the validation, if done.                                                                                                               | 6-7      |
| Risk groups                  | 11  | Provide details on how risk groups were created, if done.                                                                                                                                             | 6        |
| Development vs. validation   | 12  | For validation, identify any differences from the development data in setting, eligibility criteria, outcome, and predictors.                                                                         | Table S7 |
| <b>Results</b>               |     |                                                                                                                                                                                                       |          |
| Participants                 | 13a | Describe the flow of participants through the study, including the number of participants with and without the outcome and, if applicable, a summary of the follow-up time. A diagram may be helpful. | Fig S1   |
|                              | 13b | Describe the characteristics of the participants (basic demographics, clinical features, available predictors), including the number of participants with missing data for predictors and outcome.    | Table 1  |
|                              | 13c | For validation, show a comparison with the development data of the distribution of important variables (demographics, predictors and outcome).                                                        | Table S7 |
| Model performance            | 16  | Report performance measures (with CIs) for the prediction model.                                                                                                                                      | 8-9      |
| Model-updating               | 17  | If done, report the results from any model updating (i.e., model specification, model performance).                                                                                                   | 8-9      |
| <b>Discussion</b>            |     |                                                                                                                                                                                                       |          |
| Limitations                  | 18  | Discuss any limitations of the study (such as nonrepresentative sample, few events per predictor, missing data).                                                                                      | 12       |
| Interpretation               | 19a | For validation, discuss the results with reference to performance in the development data, and any other validation data.                                                                             | 8-9      |
|                              | 19b | Give an overall interpretation of the results, considering objectives, limitations, results from similar studies, and other relevant evidence.                                                        | 10-11    |

|                           |    |                                                                                                                               |       |
|---------------------------|----|-------------------------------------------------------------------------------------------------------------------------------|-------|
| Implications              | 20 | Discuss the potential clinical use of the model and implications for future research.                                         | 10-11 |
| <b>Other information</b>  |    |                                                                                                                               |       |
| Supplementary information | 21 | Provide information about the availability of supplementary resources, such as study protocol, Web calculator, and data sets. | 13    |
| Funding                   | 22 | Give the source of funding and the role of the funders for the present study.                                                 | 13    |

32  
33  
34  
35  
36  
37  
38  
39  
40  
41  
42  
43  
44  
45  
46  
47  
48  
49  
50

**Supplemental Data 2:** Imputation of missing data using surrogate values and multivariate imputation by chained equations.

Encounters with respiratory or renal failure on admission were assigned highest scores for RR and SpO2 or urea, respectively. Encounters in which GCS was missing or there were no ICD-10 codes for acute encephalopathy, and billing codes for brain imaging or encephalography were present on hospital day 1, were assigned highest scores for neurologic function (Supplemental Table 2). Multiple imputation was carried out using the multivariate imputation by chained equations (MICE) via predictive mean matching (PMM) algorithm. Patterns of missingness for the four variables that had missing data – respiratory rate (RR), peripheral oxygen saturation on room air (SpO2), urea, and C-reactive protein (CRP) – are summarized in Supplemental Table 4. The set of predictors that were used to impute missing data for each variable is listed in Supplemental Table 5. A variable in this table has a value of 1 if it serves as a predictor to impute the target variable, and a value of 0 if it is not. The construction of this predictor matrix was guided by clinical and statistical judgment. Potential predictors with high level of missing values and/or low variance were excluded.

51  
52  
53  
54  
55  
56  
57  
58  
59  
60  
61  
62  
63

**Supplemental Data 3:** Surge-index calculation.

COVID-19 cases were assigned weighting according to degree of illness severity as previously described [16], with higher weighting for higher degree of illness: i) COVID-19 patients requiring mechanical ventilation, ii) COVID-19 patients admitted to the intensive care unit (ICU) or requiring high-risk non-invasive ventilation (defined in Table S2); iii) COVID-19 patients that did not meet the above two criteria). i) COVID-19 patients requiring mechanical ventilation, ii) COVID-19 patients admitted to the intensive care unit (ICU) or requiring high-risk non-invasive ventilation (defined in Table S2); iii) COVID-19 patients that did not meet the above two criteria). The sum of weighted COVID-19 cases over each month for each hospital was divided by pre-pandemic bed capacity of the respective hospitals and multiplied by a factor of 10 to give the surge index value for that hospital-month.

64  
65  
66  
67  
68  
69  
70  
71  
72  
73  
74

**Supplemental Data 4:** Handling multiple imputed datasets to generate AUC point estimates and confidence intervals.

First, 100 imputations of missing data were performed, each with 5 iterations, to generate 100 complete datasets for each pandemic wave. AUC, sensitivity, specificity, positive predictive value, and negative predictive value were calculated for 4C, m4C, and m4C without age within each imputed data set for Wave 1 and for m4C alone within each imputed data set for Wave 1, Wave 2, Wave 3, Delta, and early Omicron. Values from parallel imputed data sets were pooled by applying Rubin’s rule to generate point estimates. To assess the variation of those estimates, bootstrap based 95% confidence intervals were computed. We first sampled the data with replacement 1,000 times and for each of the resamples, 100 imputations were created. The point estimate for each bootstrap iteration was obtained by averaging the estimates across the 100

75 imputations. The procedure of bootstrap resampling followed by multiple imputation within each  
 76 bootstrap iteration approximates the sampling distribution for each statistic of interest. The 95%  
 77 bootstrap confidence interval for each estimate was computed using the 2.5<sup>th</sup> and the 97.5<sup>th</sup>  
 78 percentiles of the bootstrap distribution.

79  
 80  
 81 **Table S1:** Diagnostic codes used to capture COVID-19 cases and comorbid and acute conditions  
 82 for 4C and m4C score calculation.

| Diagnosis                                                | ICD-10 codes                                                                                                                                                                                                                                                                                                                                    |
|----------------------------------------------------------|-------------------------------------------------------------------------------------------------------------------------------------------------------------------------------------------------------------------------------------------------------------------------------------------------------------------------------------------------|
| COVID-19                                                 | March 2020 only: B97.29 + one of the following: J12.89, J12.81, J12.9, J18.0, J18.1, J18.2, J18.8, J18.9, J20.8, J20.9, J40, J22, J98.8, J98.9, J98.0, J98.01, J98.09, J98.1, J98.11, J98.19, J80, J96, J96.0, J96.00, J96.01, J96.02, J96.2, J96.20, J96.21, J96.22, J96.9, J96.90, J96.91, J96.92<br>March 2020 – January 2022: U07.1, J12.82 |
| Chronic cardiac disease                                  | I21.x, I22.x, I25.2, I09.9, I11.0, I13.0, I13.2, I25.5, I42.0, I42.5-I42.9, I43.x, I50.x, P29.0                                                                                                                                                                                                                                                 |
| Chronic respiratory disease                              | I27.8, I27.9, J40.x-J44.x, J47.x, J60.x-J67.x, J68.4, J70.1, J70.3                                                                                                                                                                                                                                                                              |
| Chronic renal disease (eGFR ≤30 ml/min)                  | I12.0, I13.1, N03.2-N03.7, N05.2-N05.7, N18.x, N19.x, N25.0, Z49.0-Z49.2, Z94.0, Z99.2                                                                                                                                                                                                                                                          |
| Mild to severe liver disease                             | B18.x, K70.0-K70.3, K70.9, K71.3-K71.5, K71.7, K73.x, K74.x, K76.0, K76.2-K76.4, K76.8, K76.9, Z94.4, I85.0, I85.9, I86.4, I98.2, K70.4, K71.1, K72.1, K72.9, K76.5, K76.6, K76.7                                                                                                                                                               |
| Dementia                                                 | F00.x-F03.x, F05.1, G30.x, G31.1                                                                                                                                                                                                                                                                                                                |
| Chronic neurological conditions                          | G45.x, G46.x, H34.0, I60.x-I69.x, G04.1, G11.4, G80.1, G80.2, G81.x, G82.x, G83.0-G83.4, G83.9                                                                                                                                                                                                                                                  |
| Connective tissue disease                                | M05.x, M06.x, M31.5, M32.x-M34.x, M35.1, M35.3, M36.0                                                                                                                                                                                                                                                                                           |
| Diabetes mellitus                                        | E10.0, E10.1, E10.6, E10.8, E10.9, E11.0, E11.1, E11.6, E11.8, E11.9, E12.0, E12.1, E12.6, E12.8, E12.9, E13.0, E13.1, E13.6, E13.8, E13.9, E14.0, E14.1, E14.6, E14.8, E14.9, E10.2-E10.5, E10.7, E11.2-E11.5, E11.7, E12.2-E12.5, E12.7, E13.2-E13.5, E13.7, E14.2-E14.5, E14.7                                                               |
| HIV/ AIDS                                                | B20.x-B22.x, B24.x                                                                                                                                                                                                                                                                                                                              |
| Malignancy                                               | C00.x-C26.x, C30.x-C34.x, C37.x-C41.x, C43.x, C45.x-C58.x, C60.x-C76.x, C81.x-C85.x, C88.x, C90.x-C97.x, C77.x-C80.x                                                                                                                                                                                                                            |
| Obesity                                                  | E66.0, E66.1, E66.2, E66.8, E66.9, Z68.3, Z68.4                                                                                                                                                                                                                                                                                                 |
| Encephalopathy                                           | R40.1, R40.2, R40.3, R40.4, G92.x, G93.4, E51.2, I67.4, I67.83, K72.91                                                                                                                                                                                                                                                                          |
| Chronic renal disease stage 5 or end-stage renal disease | Z99.2, I13.11, I12.0, N18.5, N18.6                                                                                                                                                                                                                                                                                                              |

83  
 84 **Table S2:** m4C score rubric.

| Category | Variable | Points |
|----------|----------|--------|
|          |          |        |

|                               |                                                                                                  |   |
|-------------------------------|--------------------------------------------------------------------------------------------------|---|
| Age*                          | Age (years)                                                                                      |   |
|                               | <50                                                                                              | 0 |
|                               | 50-59                                                                                            | 2 |
|                               | 60-69                                                                                            | 4 |
|                               | 70-79                                                                                            | 6 |
|                               | ≥80                                                                                              | 7 |
| Gender*                       | Gender                                                                                           |   |
|                               | Female                                                                                           | 0 |
|                               | Male                                                                                             | 1 |
| Comorbid disease <sup>†</sup> | Number of comorbidities                                                                          |   |
|                               | 0                                                                                                | 0 |
|                               | 1                                                                                                | 1 |
|                               | ≥2                                                                                               | 2 |
| Respiratory rate              | Respiratory rate (breaths/min) <sup>‡</sup>                                                      |   |
|                               | <20                                                                                              | 0 |
|                               | 20-29                                                                                            | 1 |
|                               | ≥30                                                                                              | 2 |
|                               | Need for MV or high-risk NIV <sup>§</sup> on hospital day 1                                      | 2 |
| Oxygen saturation             | Peripheral oxygen saturation on room air (%) <sup>‡</sup>                                        |   |
|                               | ≥92                                                                                              | 0 |
|                               | <92                                                                                              | 2 |
|                               | Oxygen saturation calculated from partial pressure of oxygen on arterial blood gas <sup>  </sup> |   |
|                               | ≥92                                                                                              | 0 |
|                               | <92                                                                                              | 2 |
|                               | Need for MV or high-risk NIV <sup>§</sup> on hospital day 1                                      | 2 |
| Neurologic function           | Glasgow coma scale score <sup>‡</sup>                                                            |   |
|                               | 15                                                                                               | 0 |
|                               | <15                                                                                              | 2 |
|                               | Billing code for electroencephalography or brain imaging on hospital day 1                       | 2 |
|                               | ICD-10 code for encephalopathy present-on-admission <sup>†</sup>                                 | 2 |
| Urea                          | Urea (mmol/L) <sup>  </sup>                                                                      |   |
|                               | <7                                                                                               | 0 |
|                               | 7-14                                                                                             | 1 |
|                               | >14                                                                                              | 3 |
|                               | Procedure code for renal replacement therapy on hospital day 1**                                 | 3 |

|  |                                                                                                            |   |
|--|------------------------------------------------------------------------------------------------------------|---|
|  | ICD-10 code for chronic renal disease stage 5 or end-stage renal disease present-on-admission <sup>†</sup> | 3 |
|--|------------------------------------------------------------------------------------------------------------|---|

MV = mechanical ventilation; NIV = non-invasive ventilation.  
 \*Age and sex were available from encounter administrative data.  
<sup>†</sup>Co-morbidities, acute encephalopathy, and chronic renal disease were identified using ICD-10 codes present-on-admission for the index encounter or within any prior encounter within PINC-AI in the preceding 1 year (Table S1).  
<sup>‡</sup>First recorded value of vital signs were obtained from encounter day 1.  
<sup>§</sup>High-risk NIV refers to NIV other than for pre-existing obstructive sleep apnea or obesity hypoventilation syndrome [16].  
<sup>||</sup>First recorded value of laboratory values were obtained from encounter days 1-2.  
 Oxygen saturation calculated from partial pressure of arterial oxygen, using Severinghaus equation.  
 \*\*Renal replacement therapy captured using ICD-PCS codes 5A1D70Z, 5A1D80Z, 5A1D90Z or 3E1M39Z.

85  
86  
87

**Table S3:** 4C and m4C without age score rubrics.

| Category                      | Variable                                                    | 4C score points | m4C without age score points |
|-------------------------------|-------------------------------------------------------------|-----------------|------------------------------|
| Age*                          | Age (years)                                                 |                 |                              |
|                               | <50                                                         | 0               | 0                            |
|                               | 50-59                                                       | 2               | 0                            |
|                               | 60-69                                                       | 4               | 0                            |
|                               | 70-79                                                       | 6               | 0                            |
|                               | ≥80                                                         | 7               | 0                            |
| Gender*                       | Gender                                                      |                 |                              |
|                               | Female                                                      | 0               | 0                            |
|                               | Male                                                        | 1               | 1                            |
| Comorbid disease <sup>†</sup> | Number of comorbidities                                     |                 |                              |
|                               | 0                                                           | 0               | 0                            |
|                               | 1                                                           | 1               | 1                            |
|                               | ≥2                                                          | 2               | 2                            |
| Respiratory rate              | Respiratory rate (breaths/min) <sup>‡</sup>                 |                 |                              |
|                               | <20                                                         | 0               | 0                            |
|                               | 20-29                                                       | 1               | 1                            |
|                               | ≥30                                                         | 2               | 2                            |
|                               | Need for MV or high-risk NIV <sup>§</sup> on hospital day 1 | 2               | 2                            |
| Oxygen saturation             | Peripheral oxygen saturation on room air (%) <sup>‡</sup>   |                 |                              |
|                               | ≥92                                                         | 0               | 0                            |
|                               | <92                                                         | 2               | 2                            |

|                     |                                                                                                            |   |    |
|---------------------|------------------------------------------------------------------------------------------------------------|---|----|
|                     | Oxygen saturation calculated from partial pressure of oxygen on arterial blood gas <sup>ll</sup>           |   |    |
|                     | ≥92                                                                                                        | 0 | 0  |
|                     | <92                                                                                                        | 2 | 2  |
|                     | Need for MV or high-risk NIV <sup>§</sup> on hospital day 1                                                | 2 | 2  |
| Neurologic function | Glasgow coma scale score <sup>‡</sup>                                                                      |   |    |
|                     | 15                                                                                                         | 0 | 0  |
|                     | <15                                                                                                        | 2 | 2  |
|                     | Billing code for electroencephalography or brain imaging on hospital day 1                                 | 2 | 2  |
|                     | ICD-10 code for encephalopathy <sup>†</sup> present-on-admission                                           | 2 | 2  |
| Renal function      | Urea (mmol/L) <sup>ll</sup>                                                                                |   |    |
|                     | <7                                                                                                         | 0 | 0  |
|                     | 7-14                                                                                                       | 1 | 1  |
|                     | >14                                                                                                        | 3 | 3  |
|                     | Procedure code for renal replacement therapy on hospital day 1 <sup>**</sup>                               | 3 | 3  |
|                     | ICD-10 code for chronic renal disease stage 5 or end-stage renal disease <sup>†</sup> present-on-admission | 4 | 4  |
| C-reactive protein  | C-reactive protein (mg/L) <sup>ll</sup>                                                                    |   |    |
|                     | <50                                                                                                        | 0 | NA |
|                     | 50-99                                                                                                      | 1 | NA |
|                     | ≥100                                                                                                       | 2 | NA |

MV = mechanical ventilation; NIV = non-invasive ventilation.

\*Age and sex were available from encounter administrative data.

†Co-morbidities, acute encephalopathy, and chronic renal disease were identified using ICD-10 codes present-on-admission for the index encounter or within any prior encounter within PINC-AI in the preceding 1 year (Table S1).

‡First recorded value of vital signs were obtained from encounter day 1.

§High-risk NIV refers to NIV other than for pre-existing obstructive sleep apnea or obesity hypoventilation syndrome [16].

<sup>ll</sup>First recorded value of laboratory values were obtained from encounter days 1-2.

Oxygen saturation calculated from partial pressure of arterial oxygen, using Severinghaus equation.

\*\*Renal replacement therapy captured using ICD-PCS codes 5A1D70Z, 5A1D80Z, 5A1D90Z or 3E1M39Z.

88  
89  
90

**Table S4:** Missingness of individual m4C and 4C score components.

| Score Component | Missing, N (%) |
|-----------------|----------------|
| Age             | 0 (0%)         |
| Gender          | 0 (0%)         |

|                                 |                 |
|---------------------------------|-----------------|
| No. comorbidities*              | 0 (0%)          |
| Respiratory rate                | 148,165 (49.7%) |
| Oxygen saturation               | 156,194 (52.4%) |
| Acute encephalopathy*           | 0 (0%)          |
| Glasgow coma scale score        | 282,965 (94.8%) |
| Urea                            | 84,747 (28.4%)  |
| C-reactive protein <sup>†</sup> | 153,197 (51.3%) |

91 \*Missing values (i.e., absent coding) imputed as normal.

92 <sup>†</sup>For 4C score only.

93

94

95

**Table S5:** Predictor matrix of multiple imputation models.

| Variable names                                                                                                                                       | To impute respiratory rate [RR] | To impute peripheral oxygen saturation on room air [SpO2] | To impute urea | To impute C-reactive protein [CRP]* |
|------------------------------------------------------------------------------------------------------------------------------------------------------|---------------------------------|-----------------------------------------------------------|----------------|-------------------------------------|
| Admission wave <sup>†</sup>                                                                                                                          | 1                               | 1                                                         | 1              | 1                                   |
| Binary indicator for encounters with COVID as primary encounter diagnosis; 2 for encounters with COVID as secondary encounter diagnosis              | 1                               | 1                                                         | 1              | 1                                   |
| Age in years                                                                                                                                         | 1                               | 1                                                         | 1              | 1                                   |
| Gender                                                                                                                                               | 1                               | 1                                                         | 1              | 1                                   |
| 4C score for GCS                                                                                                                                     | 1                               | 1                                                         | 1              | 1                                   |
| Mapped race/ethnicity                                                                                                                                | 1                               | 1                                                         | 1              | 1                                   |
| Mapped admission source                                                                                                                              | 1                               | 1                                                         | 1              | 1                                   |
| Hospital beds count                                                                                                                                  | 1                               | 1                                                         | 1              | 1                                   |
| Hospital teaching status                                                                                                                             | 1                               | 1                                                         | 1              | 1                                   |
| Hospital urban/ rural status                                                                                                                         | 1                               | 1                                                         | 1              | 1                                   |
| Census region of hospital                                                                                                                            | 1                               | 1                                                         | 1              | 1                                   |
| Binary indicator for encounters with either ICD10 codes POA or present in prior encounter history for Chronic cardiac disease                        | 1                               | 1                                                         | 1              | 1                                   |
| Binary indicator for encounters with either ICD10 codes POA or present in prior encounter history for Chronic respiratory disease (excluding asthma) | 1                               | 1                                                         | 1              | 1                                   |



|                                                                                                                                         |   |   |   |   |
|-----------------------------------------------------------------------------------------------------------------------------------------|---|---|---|---|
| Binary indicator for encounters with either ICD10 codes POA or present in prior encounter history for Chronic renal disease (eGFR <=30) | 1 | 1 | 1 | 1 |
| Binary indicator for encounters with either ICD10 codes POA or present in prior encounter history for Mild to severe liver disease      | 1 | 1 | 1 | 1 |
| Binary indicator for encounters with either ICD10 codes POA or present in prior encounter history for Dementia                          | 1 | 1 | 1 | 1 |
| Binary indicator for encounters with either ICD10 codes POA or present in prior encounter history for Chronic neurological conditions   | 1 | 1 | 1 | 1 |
| Binary indicator for encounters with either ICD10 codes POA or present in prior encounter history for Connective tissue disease         | 1 | 1 | 1 | 1 |
| Binary indicator for encounters with either ICD10 codes POA or present in prior encounter history for Diabetes mellitus                 | 1 | 1 | 1 | 1 |
| Binary indicator for encounters with either ICD10 codes POA or present in prior encounter history for HIV/ AIDS                         | 1 | 1 | 1 | 1 |
| Binary indicator for encounters with either ICD10 codes POA or present in prior encounter history for Malignancy                        | 1 | 1 | 1 | 1 |
| Binary indicator for encounters with either ICD10 codes POA or present in prior encounter history for Obesity                           | 1 | 1 | 1 | 1 |
| Binary indicator for encounters with MV based on ICD-PCS codes on Day 1                                                                 | 0 | 0 | 1 | 1 |

|                                                                                         |   |   |   |   |
|-----------------------------------------------------------------------------------------|---|---|---|---|
| Binary indicator for encounters with High-risk NIV based on ICD-PCS code on Day 1       | 0 | 0 | 1 | 1 |
| Binary indicator for encounters with Encephalopathy ICD-10 coding (diagnosis POA)       | 1 | 1 | 1 | 1 |
| Binary indicator for encounters with billing codes for CT head/ MR head/ EEG on Day 1-2 | 1 | 1 | 1 | 1 |
| Binary indicator for encounters with ICD10 codes POA for Chronic RRT                    | 1 | 1 | 0 | 1 |
| Binary indicator for encounters with ICD-PCS codes for Acute RRT on Day 1               | 1 | 1 | 0 | 1 |
| Binary indicator for encounters with positive lab diagnosis of COVID                    | 1 | 1 | 1 | 1 |

96 GCS = Glasgow Coma Scale score; POA = Present-on-admission; eGFR = Estimated glomerular  
 97 filtration rate; NIV = Non-invasive ventilation; MV = Mechanical ventilation; CT = Computerized  
 98 tomography; MR = Magnetic resonance imaging; RRT = Renal replacement therapy.

99 \*For 4C only, as CRP is not a component of m4C.

100 †Included as an imputation predictor in the analysis that involves all the five pandemic waves. For wave-  
 101 specific analyses, it was excluded.

102  
 103

104 **Table S6:** Sensitivity, specificity, positive predictive value, and negative predictive value of  
 105 m4C score during Wave 1 using different score cutoffs.

| m4C Score Cutoff | Sensitivity | Specificity | Positive Predictive Value | Negative Predictive Value |
|------------------|-------------|-------------|---------------------------|---------------------------|
| ≥6               | 91.7%       | 44.0%       | 22.0%                     | 96.8%                     |
| ≥7               | 87.5%       | 52.3%       | 24.1%                     | 96.0%                     |
| ≥8               | 80.9%       | 60.4%       | 26.1%                     | 94.8%                     |
| ≥9               | 72.9%       | 68.8%       | 28.8%                     | 93.6%                     |

106  
 107

108 **Table S7:** Characteristics of adult COVID-19 hospitalizations in 281 hospitals in PINC-AI (1  
 109 March 2020 – 31 January 2022).

| Characteristic | Overall,<br>N = 298,379 | Wave 1,<br>N = 14,542 | Wave 2,<br>N = 37,175 | Wave 3,<br>N = 128,780 | Delta,<br>N = 91,250 | Early<br>Omicron,<br>N = 26,632 |
|----------------|-------------------------|-----------------------|-----------------------|------------------------|----------------------|---------------------------------|
|----------------|-------------------------|-----------------------|-----------------------|------------------------|----------------------|---------------------------------|

| <b>Demographics</b>               |                  |                 |                 |                  |                 |                 |
|-----------------------------------|------------------|-----------------|-----------------|------------------|-----------------|-----------------|
| <b>Age in years, median (IQR)</b> | 62 (48, 73)      | 61 (48, 72)     | 61 (47, 73)     | 64 (51, 75)      | 59 (45, 71)     | 63 (47, 75)     |
| <b>Sex</b>                        |                  |                 |                 |                  |                 |                 |
| Female                            | 146,201<br>(49%) | 6,820 (47%)     | 18,622<br>(50%) | 62,359 (48%)     | 44,615<br>(49%) | 13,785<br>(52%) |
| Male                              | 152,178<br>(51%) | 7,722 (53%)     | 18,553<br>(50%) | 66,421 (52%)     | 46,635<br>(51%) | 12,847<br>(48%) |
| <b>Race</b>                       |                  |                 |                 |                  |                 |                 |
| Hispanic                          | 43,646 (15%)     | 3,305 (23%)     | 8,971 (24%)     | 18,080 (14%)     | 10,128<br>(11%) | 3,162 (12%)     |
| Non-Hispanic Black                | 55,015 (18%)     | 3,760 (26%)     | 8,864 (24%)     | 22,425 (17%)     | 14,965<br>(16%) | 5,001 (19%)     |
| Non-Hispanic White                | 174,433<br>(58%) | 5,605 (39%)     | 16,041<br>(43%) | 76,929 (60%)     | 59,431<br>(65%) | 16,427<br>(62%) |
| Other                             | 25,285<br>(8.5%) | 1,872 (13%)     | 3,299 (8.9%)    | 11,346<br>(8.8%) | 6,726 (7.4%)    | 2,042 (7.7%)    |
| <b>Admission source</b>           |                  |                 |                 |                  |                 |                 |
| Home                              | 257,492<br>(86%) | 12,060<br>(83%) | 32,044<br>(86%) | 110,845<br>(86%) | 79,823<br>(87%) | 22,720<br>(85%) |
| Acute Care Facility               | 21,858<br>(7.3%) | 871 (6.0%)      | 2,866 (7.7%)    | 10,271<br>(8.0%) | 6,269 (6.9%)    | 1,581 (5.9%)    |
| Subacute Facility                 | 9,301 (3.1%)     | 1,224 (8.4%)    | 1,247 (3.4%)    | 4,003 (3.1%)     | 1,947 (2.1%)    | 880 (3.3%)      |
| Other                             | 9,728 (3.3%)     | 387 (2.7%)      | 1,018 (2.7%)    | 3,661 (2.8%)     | 3,211 (3.5%)    | 1,451 (5.4%)    |
| <b>Hospital features</b>          |                  |                 |                 |                  |                 |                 |
| <b>Bed count</b>                  |                  |                 |                 |                  |                 |                 |
| 0-99                              | 26,904<br>(9.0%) | 562 (3.9%)      | 2,298 (6.2%)    | 11,318<br>(8.8%) | 10,221<br>(11%) | 2,505 (9.4%)    |
| 100-199                           | 50,394 (17%)     | 2,139 (15%)     | 6,130 (16%)     | 21,812 (17%)     | 16,520<br>(18%) | 3,793 (14%)     |
| 200-299                           | 49,645 (17%)     | 2,090 (14%)     | 5,600 (15%)     | 22,381 (17%)     | 15,095<br>(17%) | 4,479 (17%)     |
| 300-399                           | 54,147 (18%)     | 3,033 (21%)     | 6,362 (17%)     | 24,045 (19%)     | 15,828<br>(17%) | 4,879 (18%)     |
| 400-499                           | 21,742<br>(7.3%) | 892 (6.1%)      | 2,790 (7.5%)    | 9,334 (7.2%)     | 7,019 (7.7%)    | 1,707 (6.4%)    |
| 500+                              | 95,547 (32%)     | 5,826 (40%)     | 13,995<br>(38%) | 39,890 (31%)     | 26,567<br>(29%) | 9,269 (35%)     |
| <b>Teaching status</b>            | 119,731<br>(40%) | 8,118 (56%)     | 14,173<br>(38%) | 52,649 (41%)     | 33,362<br>(37%) | 11,429<br>(43%) |
| <b>Location</b>                   |                  |                 |                 |                  |                 |                 |
| Rural                             | 50,731 (17%)     | 1,299 (8.9%)    | 6,126 (16%)     | 21,284 (17%)     | 17,705<br>(19%) | 4,317 (16%)     |
| Urban                             | 247,648<br>(83%) | 13,243<br>(91%) | 31,049<br>(84%) | 107,496<br>(83%) | 73,545<br>(81%) | 22,315<br>(84%) |
| <b>Census region</b>              |                  |                 |                 |                  |                 |                 |

|                                                            |                |                |                |                 |                |                 |
|------------------------------------------------------------|----------------|----------------|----------------|-----------------|----------------|-----------------|
| Midwest                                                    | 57,622 (19%)   | 3,749 (26%)    | 4,969 (13%)    | 25,324 (20%)    | 19,148 (21%)   | 4,432 (17%)     |
| Northeast                                                  | 35,060 (12%)   | 3,810 (26%)    | 1,699 (4.6%)   | 17,155 (13%)    | 8,314 (9.1%)   | 4,082 (15%)     |
| South                                                      | 195,542 (66%)  | 6,952 (48%)    | 29,523 (79%)   | 83,053 (64%)    | 59,551 (65%)   | 16,463 (62%)    |
| West                                                       | 10,155 (3.4%)  | 31 (0.2%)      | 984 (2.6%)     | 3,248 (2.5%)    | 4,237 (4.6%)   | 1,655 (6.2%)    |
| <b>Comorbidities</b>                                       |                |                |                |                 |                |                 |
| <b>Chronic cardiac disease</b>                             | 64,556 (22%)   | 3,024 (21%)    | 7,279 (20%)    | 29,073 (23%)    | 17,711 (19%)   | 7,469 (28%)     |
| <b>Chronic respiratory disease</b>                         | 51,363 (17%)   | 2,207 (15%)    | 5,549 (15%)    | 22,888 (18%)    | 14,753 (16%)   | 5,966 (22%)     |
| <b>Chronic renal disease</b>                               | 64,111 (21%)   | 3,317 (23%)    | 7,817 (21%)    | 29,469 (23%)    | 16,617 (18%)   | 6,891 (26%)     |
| <b>Chronic liver disease</b>                               | 21,213 (7.1%)  | 888 (6.1%)     | 2,242 (6.0%)   | 9,038 (7.0%)    | 6,729 (7.4%)   | 2,316 (8.7%)    |
| <b>Dementia</b>                                            | 23,293 (7.8%)  | 1,887 (13%)    | 3,578 (9.6%)   | 10,242 (8.0%)   | 5,086 (5.6%)   | 2,500 (9.4%)    |
| <b>Chronic neurologic disease</b>                          | 22,347 (7.5%)  | 1,070 (7.4%)   | 2,428 (6.5%)   | 9,833 (7.6%)    | 6,105 (6.7%)   | 2,911 (11%)     |
| <b>Connective tissue disease</b>                           | 10,762 (3.6%)  | 448 (3.1%)     | 1,167 (3.1%)   | 4,944 (3.8%)    | 3,056 (3.3%)   | 1,147 (4.3%)    |
| <b>Diabetes mellitus</b>                                   | 91,029 (31%)   | 4,873 (34%)    | 11,933 (32%)   | 41,658 (32%)    | 23,803 (26%)   | 8,762 (33%)     |
| <b>HIV/ AIDS</b>                                           | 1,029 (0.3%)   | 78 (0.5%)      | 149 (0.4%)     | 427 (0.3%)      | 264 (0.3%)     | 111 (0.4%)      |
| <b>Malignancy</b>                                          | 18,774 (6.3%)  | 750 (5.2%)     | 1,865 (5.0%)   | 8,525 (6.6%)    | 5,349 (5.9%)   | 2,285 (8.6%)    |
| <b>Obesity</b>                                             | 68,639 (23%)   | 2,774 (19%)    | 8,159 (22%)    | 29,672 (23%)    | 22,270 (24%)   | 5,764 (22%)     |
| <b>m4C Score Components</b>                                |                |                |                |                 |                |                 |
| <b>No. of comorbidities</b>                                | 1 (0, 2)       | 1 (0, 2)       | 1 (0, 2)       | 1 (0, 2)        | 1 (0, 2)       | 1 (0, 3)        |
| <b>Oxygen saturation by co-oximetry (%)</b> , median (IQR) | 95 (92, 98)    | 96 (93, 98)    | 96 (93, 98)    | 95 (93, 97)     | 95 (92, 97)    | 96 (93, 98)     |
| <b>Oxygen saturation from blood gas (%)</b> , median (IQR) | 93 (88, 96)    | 94 (89, 97)    | 93 (88, 96)    | 93 (88, 97)     | 92 (86, 96)    | 93 (86, 97)     |
| <b>Respiratory rate</b> (breaths per minute), median (IQR) | 20 (18, 22)    | 20 (18, 24)    | 20 (18, 22)    | 20 (18, 22)     | 20 (18, 23)    | 18 (18, 22)     |
| <b>Neurologic function</b>                                 |                |                |                |                 |                |                 |
| Normal                                                     | 262,372 (88%)  | 12,899 (89%)   | 32,877 (88%)   | 113,283 (88%)   | 81,288 (89%)   | 22,025 (83%)    |
| Abnormal                                                   | 36,007 (12%)   | 1,643 (11%)    | 4,298 (12%)    | 15,497 (12%)    | 9,962 (11%)    | 4,607 (17%)     |
| <b>Urea</b> (mmol/L), median (IQR)                         | 6.1 (4.3, 9.6) | 5.7 (3.9, 9.6) | 5.7 (3.9, 9.3) | 6.4 (4.3, 10.0) | 6.1 (4.3, 9.3) | 6.8 (4.3, 11.1) |
| <b>Mechanical ventilation</b>                              | 9,770 (3.3%)   | 874 (6.0%)     | 1,267 (3.4%)   | 3,894 (3.0%)    | 2,929 (3.2%)   | 806 (3.0%)      |

|                                  |                  |                 |                 |                  |                 |                 |
|----------------------------------|------------------|-----------------|-----------------|------------------|-----------------|-----------------|
| <b>Non-invasive ventilation</b>  | 4,521 (1.5%)     | 107 (0.7%)      | 310 (0.8%)      | 1,805 (1.4%)     | 1,974 (2.2%)    | 325 (1.2%)      |
| <b>Renal replacement therapy</b> | 2,927 (1.0%)     | 208 (1.4%)      | 379 (1.0%)      | 1,214 (0.9%)     | 709 (0.8%)      | 417 (1.6%)      |
| <b>Outcome</b>                   |                  |                 |                 |                  |                 |                 |
| <b>Survival</b>                  | 262,679<br>(88%) | 12,401<br>(85%) | 33,068<br>(89%) | 113,946<br>(88%) | 79,387<br>(87%) | 23,877<br>(90%) |
| <b>Death</b>                     | 29,239<br>(9.8%) | 1,672 (11%)     | 3,251 (8.7%)    | 12,042<br>(9.4%) | 10,191<br>(11%) | 2,083 (7.8%)    |
| <b>Hospice</b>                   | 6,461 (2.2%)     | 469 (3.2%)      | 856 (2.3%)      | 2,792 (2.2%)     | 1,672 (1.8%)    | 672 (2.5%)      |

110

111

112

**Table S8:** Main features of study cohort and the 4C and m4C development cohorts.

| <b>Feature</b>   | <b>Study cohort</b>                                                                                                                                                                                                                                                           | <b>4C development cohort*</b>                                                 | <b>m4C development cohort<sup>†</sup></b>                                                                                       |
|------------------|-------------------------------------------------------------------------------------------------------------------------------------------------------------------------------------------------------------------------------------------------------------------------------|-------------------------------------------------------------------------------|---------------------------------------------------------------------------------------------------------------------------------|
| Data source      | Administrative database                                                                                                                                                                                                                                                       | COVID-19 registry drawing from case report forms                              | COVID-19 registry drawing from case report forms and electronic healthcare records, supplemented by chart review                |
| Facilities       | 281 U.S. hospitals                                                                                                                                                                                                                                                            | 260 U.K. hospitals                                                            | 40 U.S. medical centers                                                                                                         |
| Patients         | Adult hospital inpatients and adult patients who died in the emergency room or under observation status, with primary or secondary ICD-10 coding for COVID-19 or laboratory test positivity for SARS-CoV-2. Excluding individuals with DNR status and those with unknown sex. | Adult hospital inpatients with “high likelihood of infection with SARS-CoV-2. | Adult patients testing positive for SARS-CoV-2 and hospitalized from the emergency room. Excluding individuals with DNR status. |
| Study period     | March 2020 – January 2022                                                                                                                                                                                                                                                     | February – May 2020                                                           | March 2020 – September 2020                                                                                                     |
| Outcome          | In-hospital mortality or discharge to hospice                                                                                                                                                                                                                                 | In-hospital mortality                                                         | Mortality at 30 days                                                                                                            |
| Crude mortality  | 12.0%                                                                                                                                                                                                                                                                         | 32.2%                                                                         | 16.9%                                                                                                                           |
| Age (years)      |                                                                                                                                                                                                                                                                               |                                                                               |                                                                                                                                 |
| <50              | 27.1%                                                                                                                                                                                                                                                                         | 13.8%                                                                         | 20.8%                                                                                                                           |
| 50-69            | 40.1%                                                                                                                                                                                                                                                                         | 28.9%                                                                         | 43.5%                                                                                                                           |
| 70-79            | 19.4%                                                                                                                                                                                                                                                                         | 22.7%                                                                         | 19.1%                                                                                                                           |
| ≥80              | 13.4%                                                                                                                                                                                                                                                                         | 34.6%                                                                         | 16.5%                                                                                                                           |
| Sex distribution | 49% female                                                                                                                                                                                                                                                                    | 41.7% female                                                                  | 44% female                                                                                                                      |

|                                |                      |                  |                        |
|--------------------------------|----------------------|------------------|------------------------|
| No. comorbidities              |                      |                  |                        |
| 0                              | 32.5%                | 24.0%            | 38.7%                  |
| 1                              | 27.5%                | 28.0%            | 32.5%                  |
| ≥2                             | 40.0%                | 48.0%            | 28.9%                  |
| Oxygen saturation (%)          | 93 (88-96)           | 94.0 (6.0)       | Aggregate not reported |
| Respiratory rate (breaths/min) | 20 (18-22)           | 22.0 (9.0)       | 20 (18-23)             |
| Glasgow coma scale score       | 15.0 (0.0)           | 15.0 (0.0)       | NA                     |
| Acute encephalopathy           | 12%                  | NA               | 14.1%                  |
| Urea                           | 6.1 mmol/L (4.3-9.6) | 7.0 mmol/L (6.3) | 18 mg/dL (12-31)       |
| C-reactive protein (mg/L)      | 79 (35-140)          | 84.9 (122.0)     | Aggregate not reported |

113 \*Knight SR, *et al.* BMJ 2020

114 †Gordon AJ, *et al.* BMJ Open 2022

115

116

117

118

**Table S9:** Crude mortality of COVID-19 patients by m4C in the overall cohort and by pandemic wave.

| m4C score | Overall* | Wave 1* | Wave 2* | Wave 3* | Delta* | Early Omicron* |
|-----------|----------|---------|---------|---------|--------|----------------|
| 0-2       | 1.3      | 1.2     | 0.8     | 1.1     | 2.1    | 0.8            |
| 3-4       | 3.9      | 3.5     | 3.1     | 2.8     | 5.6    | 3.2            |
| 5-6       | 7.5      | 6.6     | 6.1     | 5.7     | 11     | 5.8            |
| 7-8       | 11.3     | 13.5    | 10.6    | 9.9     | 14.4   | 8.4            |
| 9-10      | 15.8     | 20      | 16      | 14.6    | 18     | 12.6           |
| 11-12     | 22.6     | 30.8    | 24.9    | 21.9    | 23.4   | 17.1           |
| 13-14     | 32.7     | 42.2    | 36.4    | 32.1    | 33.7   | 24.6           |
| 15-16     | 48.7     | 63.6    | 55.3    | 47.4    | 46.5   | 44.3           |
| ≥17       | 65.6     | 81.5    | 64.9    | 63.4    | 63.4   | 72.2           |

119 \*COVID-19 deaths (% of all COVID-19 encounters) for each m4C score result in the overall cohort and  
120 by pandemic wave.

121

122

123

**Table S10:** Distribution of hospital-month surge index by pandemic wave.

| Surge category*         | Surge index range | Wave 1               | Wave 2               | Wave 3                 | Delta                  | Early Omicron        |
|-------------------------|-------------------|----------------------|----------------------|------------------------|------------------------|----------------------|
|                         |                   | N = 528 <sup>†</sup> | N = 870 <sup>†</sup> | N = 2,148 <sup>†</sup> | N = 1,394 <sup>†</sup> | N = 215 <sup>†</sup> |
| Low (<50%)              | <3.18             | 416 (78.8)           | 560 (64.4)           | 1,035 (48.2)           | 545 (39.1)             | 22 (10.2)            |
| Moderate (≥50% to <75%) | ≥3.18 - <6.93     | 70 (13.3)            | 217 (24.9)           | 600 (27.9)             | 380 (27.3)             | 23 (10.7)            |
| High (≥75%)             | ≥6.93             | 42 (7.95)            | 93 (10.7)            | 513 (23.9)             | 469 (33.6)             | 170 (79.1)           |

\*Surge category defined by distribution of surge index for every hospital-month in which there was a COVID-19 admission, stratified by percentile (surge index <50<sup>th</sup>, ≥50<sup>th</sup> to <75<sup>th</sup>, and ≥75<sup>th</sup> percentiles).  
†Number of hospital months (%) within each surge category for each wave.

124  
125  
126  
127

**Table S11:** Crude mortality of COVID-19 patients by hospital-month surge category in the overall cohort and by pandemic wave.

| Surge category          | Overall* | Wave 1* | Wave 2* | Wave 3* | Delta* | Early Omicron* |
|-------------------------|----------|---------|---------|---------|--------|----------------|
| Low (<50%)              | 9.07%    | 13.1%   | 9.44%   | 8.10%   | 8.56%  | 12.5%          |
| Moderate (≥50% to <75%) | 11.3%    | 15.4%   | 11.1%   | 10.4%   | 12.2%  | 8.86%          |
| High (≥75%)             | 13.1%    | 15.8%   | 12.5%   | 13.2%   | 14.1%  | 10.4%          |

128  
129  
130  
131  
132

\*Number of COVID-19 deaths (% of all COVID-19 encounters) within each surge category in the overall cohort and by pandemic wave.

**Table S12:** Performance characteristics of m4C, 4C, and m4C without age in Wave 1.

| Characteristic* | m4C Score<br>Mean (95% CI) | 4C Score<br>Mean (95% CI) | m4C Score without age<br>Mean (95% CI) |
|-----------------|----------------------------|---------------------------|----------------------------------------|
| AUC             | 0.779 (0.769 – 0.789)      | 0.783 (0.773 – 0.793)     | 0.734 (0.723 – 0.744)                  |
| Sensitivity     | 0.917 (0.906 – 0.927)      | 0.824 (0.809 – 0.838)     | 0.663 (0.645 – 0.681)                  |
| Specificity     | 0.440 (0.431 – 0.448)      | 0.596 (0.588 – 0.604)     | 0.684 (0.676 – 0.692)                  |
| PPV             | 0.220 (0.212 – 0.229)      | 0.260 (0.251 – 0.271)     | 0.266 (0.255 – 0.277)                  |
| NPV             | 0.968 (0.964 – 0.972)      | 0.951 (0.947 – 0.956)     | 0.921 (0.916 – 0.926)                  |

133  
134  
135  
136

AUC = area under receiver operating characteristic curve, PPV = positive predictive value, NPV = negative predictive value.

\*Measures generated using score cutoffs of ≥9 and ≥6 for 4C and m4C scores, respectively.

**Table S13:** Performance characteristics of m4C by pandemic wave.

| Cohort        | AUC   |             | Sensitivity |             | Specificity |             | PPV   |             | NPV   |             |
|---------------|-------|-------------|-------------|-------------|-------------|-------------|-------|-------------|-------|-------------|
|               | Mean  | 95%CI       | Mean        | 95%CI       | Mean        | 95%CI       | Mean  | 95%CI       | Mean  | 95%CI       |
| Wave 1        | 0.779 | 0.769-0.789 | 0.917       | 0.906-0.927 | 0.440       | 0.431-0.448 | 0.220 | 0.212-0.229 | 0.968 | 0.964-0.972 |
| Wave 2        | 0.772 | 0.765-0.779 | 0.907       | 0.898-0.915 | 0.448       | 0.442-0.453 | 0.169 | 0.164-0.174 | 0.975 | 0.972-0.977 |
| Wave 3        | 0.746 | 0.743-0.750 | 0.920       | 0.916-0.925 | 0.374       | 0.371-0.376 | 0.161 | 0.158-0.163 | 0.973 | 0.972-0.974 |
| Delta         | 0.707 | 0.702-0.712 | 0.836       | 0.830-0.843 | 0.448       | 0.445-0.451 | 0.185 | 0.181-0.188 | 0.948 | 0.946-0.950 |
| Early Omicron | 0.729 | 0.721-0.738 | 0.923       | 0.913-0.932 | 0.355       | 0.349-0.361 | 0.142 | 0.137-0.147 | 0.975 | 0.972-0.978 |

138  
139  
140  
141

AUC = area under receiver operating characteristic curve, PPV = positive predictive value, NPV = negative predictive value.

142 **Table S14:** Inter-wave differences in AUCs of m4C score.

| Comparison      | Difference in AUCs<br>Mean (95% CI*) | P-value* |
|-----------------|--------------------------------------|----------|
| Wave1 - Wave2   | 0.0042 (-0.0080 – 0.0165)            | 0.4981   |
| Wave1 - Wave3   | 0.0309 (0.0200 – 0.0418)             | <0.0001  |
| Wave1 - Delta   | 0.0701 (0.0590 – 0.0813)             | <0.0001  |
| Wave1 - Omicron | 0.0452 (0.0315 – 0.0589)             | <0.0001  |
| Wave2 - Wave3   | 0.0267 (0.0186 – 0.0348)             | <0.0001  |
| Wave2 - Delta   | 0.0659 (0.0574 – 0.0744)             | <0.0001  |
| Wave2 - Omicron | 0.0410 (0.0293 – 0.0527)             | <0.0001  |
| Wave3 - Delta   | 0.0393 (0.0330 – 0.0455)             | <0.0001  |
| Wave3 - Omicron | 0.0143 (0.0042 – 0.0244)             | 0.0056   |
| Delta - Omicron | -0.0249 (-0.0354 – -0.0145)          | <0.0001  |

\*P-value and 95% confidence intervals from Delong’s test.

143  
144  
145  
146  
147

**Table S15:** Inter-wave differences in sensitivity, specificity, and positive and negative predictive values of m4C score.

|                 | Sensitivity |                     | Specificity |                     | PPV        |                     | NPV        |                     |
|-----------------|-------------|---------------------|-------------|---------------------|------------|---------------------|------------|---------------------|
|                 | Mean Diff*  | 95%CI†              | Mean Diff*  | 95%CI†              | Mean Diff* | 95%CI†              | Mean Diff* | 95%CI†              |
| Wave1 - Wave2   | 0.0130      | -0.044<br>~-0.0232  | -0.0122     | -0.0216<br>~-0.0029 | 0.0497     | 0.0389<br>~-0.0602  | -0.0066    | -0.0117<br>~-0.0021 |
| Wave1 - Wave3   | -0.0033     | -0.0157<br>~-0.0083 | 0.0622      | 0.0539<br>~-0.0707  | 0.0587     | 0.0493<br>~-0.0672  | -0.0048    | -0.0095<br>~-0.0005 |
| Wave1 - Delta   | 0.0814      | 0.0685<br>~-0.0933  | -0.0131     | -0.0217<br>~-0.0049 | 0.0344     | 0.0256<br>~-0.0436  | 0.0200     | 0.0150<br>~-0.0245  |
| Wave1 - Omicron | -0.0038     | -0.0179<br>~-0.0102 | 0.0769      | 0.0673<br>~-0.0874  | 0.0771     | 0.0672<br>~-0.0866  | -0.0070    | -0.0124<br>~-0.0020 |
| Wave2 - Wave3   | -0.0137     | -0.0227<br>~-0.0035 | 0.0745      | 0.0687<br>~-0.0805  | 0.0089     | 0.0037<br>~-0.0146  | 0.0018     | -0.0010<br>~-0.0048 |
| Wave2 - Delta   | 0.0711      | 0.0608<br>~-0.0815  | -0.0008     | -0.0071<br>~-0.0052 | -0.0153    | -0.0212<br>~-0.0093 | 0.0266     | 0.0235<br>~-0.0299  |
| Wave2 - Omicron | -0.0142     | -0.0263<br>~-0.0005 | 0.0891      | 0.0812<br>~-0.0961  | 0.0273     | 0.0206<br>~-0.0342  | -0.0004    | -0.0043<br>~-0.0036 |
| Wave3 - Delta   | 0.0847      | 0.0770<br>~-0.0921  | -0.0753     | -0.0798<br>~-0.0712 | -0.0242    | -0.0283<br>~-0.0205 | 0.0248     | 0.0222<br>~-0.0272  |
| Wave3 - Omicron | -0.0005     | -0.0107<br>~-0.0103 | 0.0146      | 0.0081<br>~-0.0207  | 0.0184     | 0.0129<br>~-0.0238  | -0.0022    | -0.0056<br>~-0.0012 |
| Delta - Omicron | -0.0853     | -0.0967<br>~-0.0736 | 0.0899      | 0.0825<br>~-0.0964  | 0.0426     | 0.0369<br>~-0.0486  | -0.0270    | -0.0309<br>~-0.0232 |

\*Mean difference across 100 imputed datasets.

†Bootstrap based 95% CIs (percentiles) around the mean difference.

148  
149  
150  
151  
152  
153

**Table S16:** Characteristics of adult COVID-19 hospitalizations in 182 hospitals in PINC-AI (1 March 2020 – 31 January 2022) – complete case records only.



| <b>Characteristic</b>             | <b>Overall, N = 125,562</b> | <b>Wave 1, N = 6,635</b> | <b>Wave 2, N = 17,834</b> | <b>Wave 3, N = 58,303</b> | <b>Delta, N = 34,177</b> | <b>Early Omicron, N = 8,613</b> |
|-----------------------------------|-----------------------------|--------------------------|---------------------------|---------------------------|--------------------------|---------------------------------|
| <b>Age in years, median (IQR)</b> | 63 (50, 74)                 | 61 (49, 72)              | 62 (50, 73)               | 64 (52, 75)               | 60 (47, 71)              | 65 (52, 75)                     |
| <b>Sex</b>                        |                             |                          |                           |                           |                          |                                 |
| Female                            | 58,230 (46%)                | 2,921 (44%)              | 8,280 (46%)               | 26,934 (46%)              | 16,080 (47%)             | 4,015 (47%)                     |
| Male                              | 67,332 (54%)                | 3,714 (56%)              | 9,554 (54%)               | 31,369 (54%)              | 18,097 (53%)             | 4,598 (53%)                     |
| <b>Race</b>                       |                             |                          |                           |                           |                          |                                 |
| Hispanic                          | 21,915 (17%)                | 1,746 (26%)              | 4,999 (28%)               | 9,890 (17%)               | 4,321 (13%)              | 959 (11%)                       |
| Non-Hispanic Black                | 19,683 (16%)                | 1,349 (20%)              | 3,656 (21%)               | 8,249 (14%)               | 4,966 (15%)              | 1,463 (17%)                     |
| Non-Hispanic White                | 74,202 (59%)                | 2,614 (39%)              | 7,834 (44%)               | 35,323 (61%)              | 22,769 (67%)             | 5,662 (66%)                     |
| Other                             | 9,762 (7.8%)                | 926 (14%)                | 1,345 (7.5%)              | 4,841 (8.3%)              | 2,121 (6.2%)             | 529 (6.1%)                      |
| <b>Admission source</b>           |                             |                          |                           |                           |                          |                                 |
| Home                              | 108,347 (86%)               | 5,412 (82%)              | 15,455 (87%)              | 50,345 (86%)              | 29,712 (87%)             | 7,423 (86%)                     |
| Acute Care Facility               | 10,394 (8.3%)               | 492 (7.4%)               | 1,442 (8.1%)              | 4,981 (8.5%)              | 2,823 (8.3%)             | 656 (7.6%)                      |
| Subacute Facility                 | 4,033 (3.2%)                | 596 (9.0%)               | 628 (3.5%)                | 1,788 (3.1%)              | 757 (2.2%)               | 264 (3.1%)                      |
| Other                             | 2,788 (2.2%)                | 135 (2.0%)               | 309 (1.7%)                | 1,189 (2.0%)              | 885 (2.6%)               | 270 (3.1%)                      |
| <b>Bed count</b>                  |                             |                          |                           |                           |                          |                                 |
| 0-99                              | 6,682 (5.3%)                | 122 (1.8%)               | 701 (3.9%)                | 2,791 (4.8%)              | 2,494 (7.3%)             | 574 (6.7%)                      |
| 100-199                           | 24,226 (19%)                | 1,127 (17%)              | 3,418 (19%)               | 11,384 (20%)              | 6,867 (20%)              | 1,430 (17%)                     |
| 200-299                           | 20,709 (16%)                | 1,047 (16%)              | 2,571 (14%)               | 10,694 (18%)              | 4,976 (15%)              | 1,421 (16%)                     |
| 300-399                           | 23,480 (19%)                | 1,561 (24%)              | 2,840 (16%)               | 11,198 (19%)              | 6,290 (18%)              | 1,591 (18%)                     |
| 400-499                           | 12,662 (10%)                | 500 (7.5%)               | 1,748 (9.8%)              | 5,376 (9.2%)              | 3,993 (12%)              | 1,045 (12%)                     |
| 500+                              | 37,803 (30%)                | 2,278 (34%)              | 6,556 (37%)               | 16,860 (29%)              | 9,557 (28%)              | 2,552 (30%)                     |

| <b>Characteristic</b>                | <b>Overall, N = 125,562</b> | <b>Wave 1, N = 6,635</b> | <b>Wave 2, N = 17,834</b> | <b>Wave 3, N = 58,303</b> | <b>Delta, N = 34,177</b> | <b>Early Omicron, N = 8,613</b> |
|--------------------------------------|-----------------------------|--------------------------|---------------------------|---------------------------|--------------------------|---------------------------------|
| <b>Teaching status</b>               | 49,464 (39%)                | 3,450 (52%)              | 6,543 (37%)               | 24,100 (41%)              | 11,903 (35%)             | 3,468 (40%)                     |
| <b>Urban location</b>                |                             |                          |                           |                           |                          |                                 |
| Rural                                | 22,187 (18%)                | 573 (8.6%)               | 3,163 (18%)               | 9,715 (17%)               | 7,047 (21%)              | 1,689 (20%)                     |
| Urban                                | 103,375 (82%)               | 6,062 (91%)              | 14,671 (82%)              | 48,588 (83%)              | 27,130 (79%)             | 6,924 (80%)                     |
| <b>Census region</b>                 |                             |                          |                           |                           |                          |                                 |
| Midwest                              | 26,255 (21%)                | 1,988 (30%)              | 2,275 (13%)               | 11,932 (20%)              | 7,886 (23%)              | 2,174 (25%)                     |
| Northeast                            | 13,605 (11%)                | 1,642 (25%)              | 778 (4.4%)                | 8,690 (15%)               | 1,676 (4.9%)             | 819 (9.5%)                      |
| South                                | 84,376 (67%)                | 3,002 (45%)              | 14,746 (83%)              | 37,472 (64%)              | 23,823 (70%)             | 5,333 (62%)                     |
| West                                 | 1,326 (1.1%)                | 3 (<0.1%)                | 35 (0.2%)                 | 209 (0.4%)                | 792 (2.3%)               | 287 (3.3%)                      |
| <b>Chronic cardiac disease</b>       | 28,246 (22%)                | 1,413 (21%)              | 3,689 (21%)               | 13,564 (23%)              | 6,933 (20%)              | 2,647 (31%)                     |
| <b>Chronic respiratory disease</b>   | 22,520 (18%)                | 995 (15%)                | 2,795 (16%)               | 10,718 (18%)              | 5,875 (17%)              | 2,137 (25%)                     |
| <b>Chronic renal disease</b>         | 27,099 (22%)                | 1,489 (22%)              | 3,758 (21%)               | 13,154 (23%)              | 6,296 (18%)              | 2,402 (28%)                     |
| <b>Mild to severe liver disease</b>  | 8,850 (7.0%)                | 392 (5.9%)               | 1,132 (6.3%)              | 4,034 (6.9%)              | 2,484 (7.3%)             | 808 (9.4%)                      |
| <b>Dementia</b>                      | 10,193 (8.1%)               | 842 (13%)                | 1,944 (11%)               | 4,571 (7.8%)              | 1,963 (5.7%)             | 873 (10%)                       |
| <b>Chronic neurologic conditions</b> | 9,259 (7.4%)                | 482 (7.3%)               | 1,236 (6.9%)              | 4,311 (7.4%)              | 2,234 (6.5%)             | 996 (12%)                       |
| <b>Connective tissue disease</b>     | 4,574 (3.6%)                | 205 (3.1%)               | 548 (3.1%)                | 2,267 (3.9%)              | 1,148 (3.4%)             | 406 (4.7%)                      |
| <b>Diabetes mellitus</b>             | 38,986 (31%)                | 2,156 (32%)              | 5,841 (33%)               | 19,017 (33%)              | 8,944 (26%)              | 3,028 (35%)                     |
| <b>HIV/ AIDS</b>                     | 426 (0.3%)                  | 35 (0.5%)                | 80 (0.4%)                 | 178 (0.3%)                | 104 (0.3%)               | 29 (0.3%)                       |
| <b>Malignancy</b>                    | 7,755 (6.2%)                | 325 (4.9%)               | 914 (5.1%)                | 3,818 (6.5%)              | 1,931 (5.6%)             | 767 (8.9%)                      |
| <b>Obesity</b>                       | 30,439 (24%)                | 1,148 (17%)              | 4,267 (24%)               | 14,165 (24%)              | 8,826 (26%)              | 2,033 (24%)                     |

| Characteristic                                      | Overall, N = 125,562 | Wave 1, N = 6,635 | Wave 2, N = 17,834 | Wave 3, N = 58,303 | Delta, N = 34,177 | Early Omicron, N = 8,613 |
|-----------------------------------------------------|----------------------|-------------------|--------------------|--------------------|-------------------|--------------------------|
| No. of comorbidities                                | 1.00 (0.00, 2.00)    | 1.00 (0.00, 2.00) | 1.00 (0.00, 2.00)  | 1.00 (0.00, 2.00)  | 1.00 (0.00, 2.00) | 2.00 (1.00, 3.00)        |
| Oxygen saturation by co-oximetry (%), median (IQR)  | 95.0 (92.0, 97.0)    | 95.0 (93.0, 98.0) | 96.0 (93.0, 98.0)  | 95.0 (92.0, 97.0)  | 94.0 (91.0, 97.0) | 96.0 (93.0, 98.0)        |
| Oxygen saturation from blood gas (%), median (IQR)  | 93 (89, 97)          | 94 (90, 97)       | 93 (89, 97)        | 93 (89, 97)        | 93 (88, 96)       | 94 (88, 97)              |
| Respiratory rate (breaths per minute), median (IQR) | 20.0 (18.0, 23.0)    | 20.0 (18.0, 24.0) | 20.0 (18.0, 22.0)  | 20.0 (18.0, 22.0)  | 20.0 (18.0, 24.0) | 19.0 (18.0, 22.0)        |
| Neurologic function                                 |                      |                   |                    |                    |                   |                          |
| Normal                                              | 108,795 (87%)        | 5,821 (88%)       | 15,375 (86%)       | 50,753 (87%)       | 29,971 (88%)      | 6,875 (80%)              |
| Abnormal                                            | 16,767 (13%)         | 814 (12%)         | 2,459 (14%)        | 7,550 (13%)        | 4,206 (12%)       | 1,738 (20%)              |
| Urea (mmol/L), median (IQR)                         | 6.4 (4.3, 10.0)      | 5.7 (3.9, 9.6)    | 6.1 (3.9, 9.6)     | 6.4 (4.3, 10.0)    | 6.1 (4.3, 9.6)    | 6.8 (4.6, 11.1)          |
| C-reactive protein (mg/L)                           | 82 (37, 143)         | 94 (44, 165)      | 80 (33, 147)       | 80 (37, 141)       | 86 (42, 143)      | 65 (24, 131)             |
| Mechanical ventilation                              | 8,146 (6.5%)         | 748 (11%)         | 1,128 (6.3%)       | 3,433 (5.9%)       | 2,253 (6.6%)      | 584 (6.8%)               |
| Non-invasive ventilation                            | 3,386 (2.7%)         | 93 (1.4%)         | 263 (1.5%)         | 1,470 (2.5%)       | 1,357 (4.0%)      | 203 (2.4%)               |
| Renal replacement therapy                           | 1,326 (1.1%)         | 86 (1.3%)         | 189 (1.1%)         | 567 (1.0%)         | 326 (1.0%)        | 158 (1.8%)               |
| Death/ discharge to hospice                         |                      |                   |                    |                    |                   |                          |
| Alive                                               | 107,901 (86%)        | 5,559 (84%)       | 15,420 (86%)       | 50,634 (87%)       | 28,769 (84%)      | 7,519 (87%)              |
| Death                                               | 14,321 (11%)         | 836 (13%)         | 1,876 (11%)        | 6,141 (11%)        | 4,624 (14%)       | 844 (9.8%)               |
| Hospice                                             | 3,340 (2.7%)         | 240 (3.6%)        | 538 (3.0%)         | 1,528 (2.6%)       | 784 (2.3%)        | 250 (2.9%)               |

154

155

156 **Table S16:** Sensitivity analysis of performance characteristics of m4C by pandemic wave using

157 only complete case records.

| Cohort | AUC | Sensitivity | Specificity | PPV | NPV |
|--------|-----|-------------|-------------|-----|-----|
|--------|-----|-------------|-------------|-----|-----|

|                  | Mean  | 95%CI            |
|------------------|-------|------------------|-------|------------------|-------|------------------|-------|------------------|-------|------------------|
| Overall          | 0.751 | 0.747 -<br>0.755 | 0.905 | 0.901 -<br>0.910 | 0.396 | 0.393 -<br>0.399 | 0.197 | 0.194 -<br>0.200 | 0.962 | 0.961 -<br>0.964 |
| Wave 1           | 0.799 | 0.786 -<br>0.812 | 0.927 | 0.909 -<br>0.941 | 0.440 | 0.427 -<br>0.452 | 0.242 | 0.23 -<br>0.256  | 0.969 | 0.962 -<br>0.975 |
| Wave 2           | 0.777 | 0.768 -<br>0.786 | 0.916 | 0.905 -<br>0.928 | 0.427 | 0.418 -<br>0.434 | 0.200 | 0.193 -<br>0.207 | 0.970 | 0.966 -<br>0.974 |
| Wave 3           | 0.766 | 0.761 -<br>0.771 | 0.931 | 0.925 -<br>0.936 | 0.369 | 0.365 -<br>0.374 | 0.183 | 0.179 -<br>0.186 | 0.972 | 0.97 -<br>0.975  |
| Delta            | 0.723 | 0.716 -<br>0.729 | 0.856 | 0.846 -<br>0.864 | 0.441 | 0.435 -<br>0.447 | 0.223 | 0.218 -<br>0.229 | 0.942 | 0.938 -<br>0.946 |
| Early<br>Omicron | 0.734 | 0.719 -<br>0.750 | 0.931 | 0.916 -<br>0.945 | 0.311 | 0.301 -<br>0.321 | 0.164 | 0.155 -<br>0.173 | 0.969 | 0.961 -<br>0.975 |

158

159

160 **Supplemental Figure Legends**

161

162 **Figure S1:** Flowchart of cohort creation.

163

164 **Figure S2:** Crude mortality rates stratified by m4C score in the entire cohort (“All waves”) and  
165 by pandemic wave.

166

167 **Figure S3:** Calibration belts of m4C by pandemic wave, with models fit to data from Wave 1  
168 (A), Wave 3 (B), and Delta (C). Solid lines represent relationship between predicted probability  
169 and observed risk, shaded areas represent 95% confidence intervals. Dotted line represents ideal  
170 calibration slope of 1 (bisector). Text indicates ranges of calibration belts lying under or over the  
171 bisector.

172

173 **Figure S4:** Calibration belts of m4C (“without surge”) and surge-adjusted models (“with surge”)  
174 by pandemic wave. Solid lines represent relationship between predicted probability and observed  
175 risk, shaded areas represent 95% confidence intervals. Dotted line represents ideal calibration  
176 slope of 1.

Figure S1

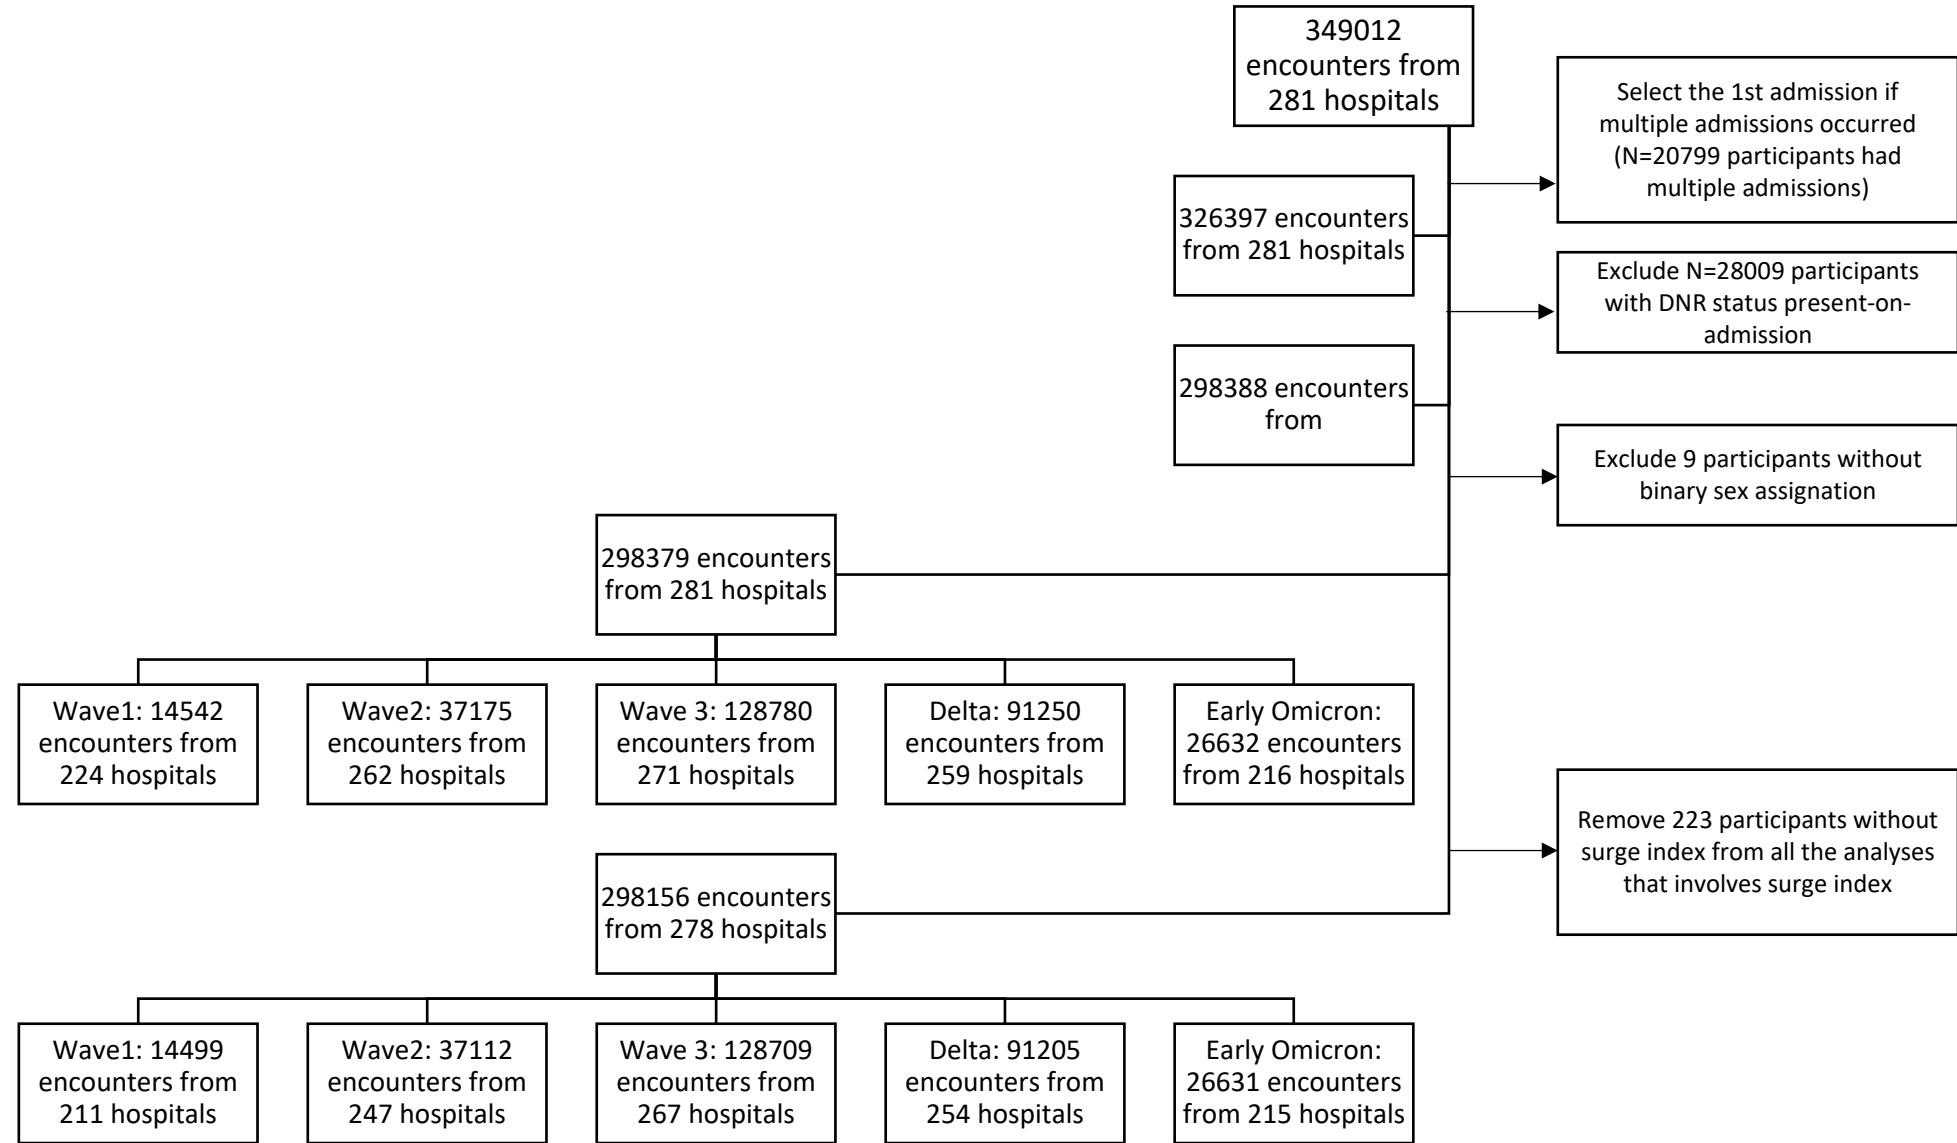

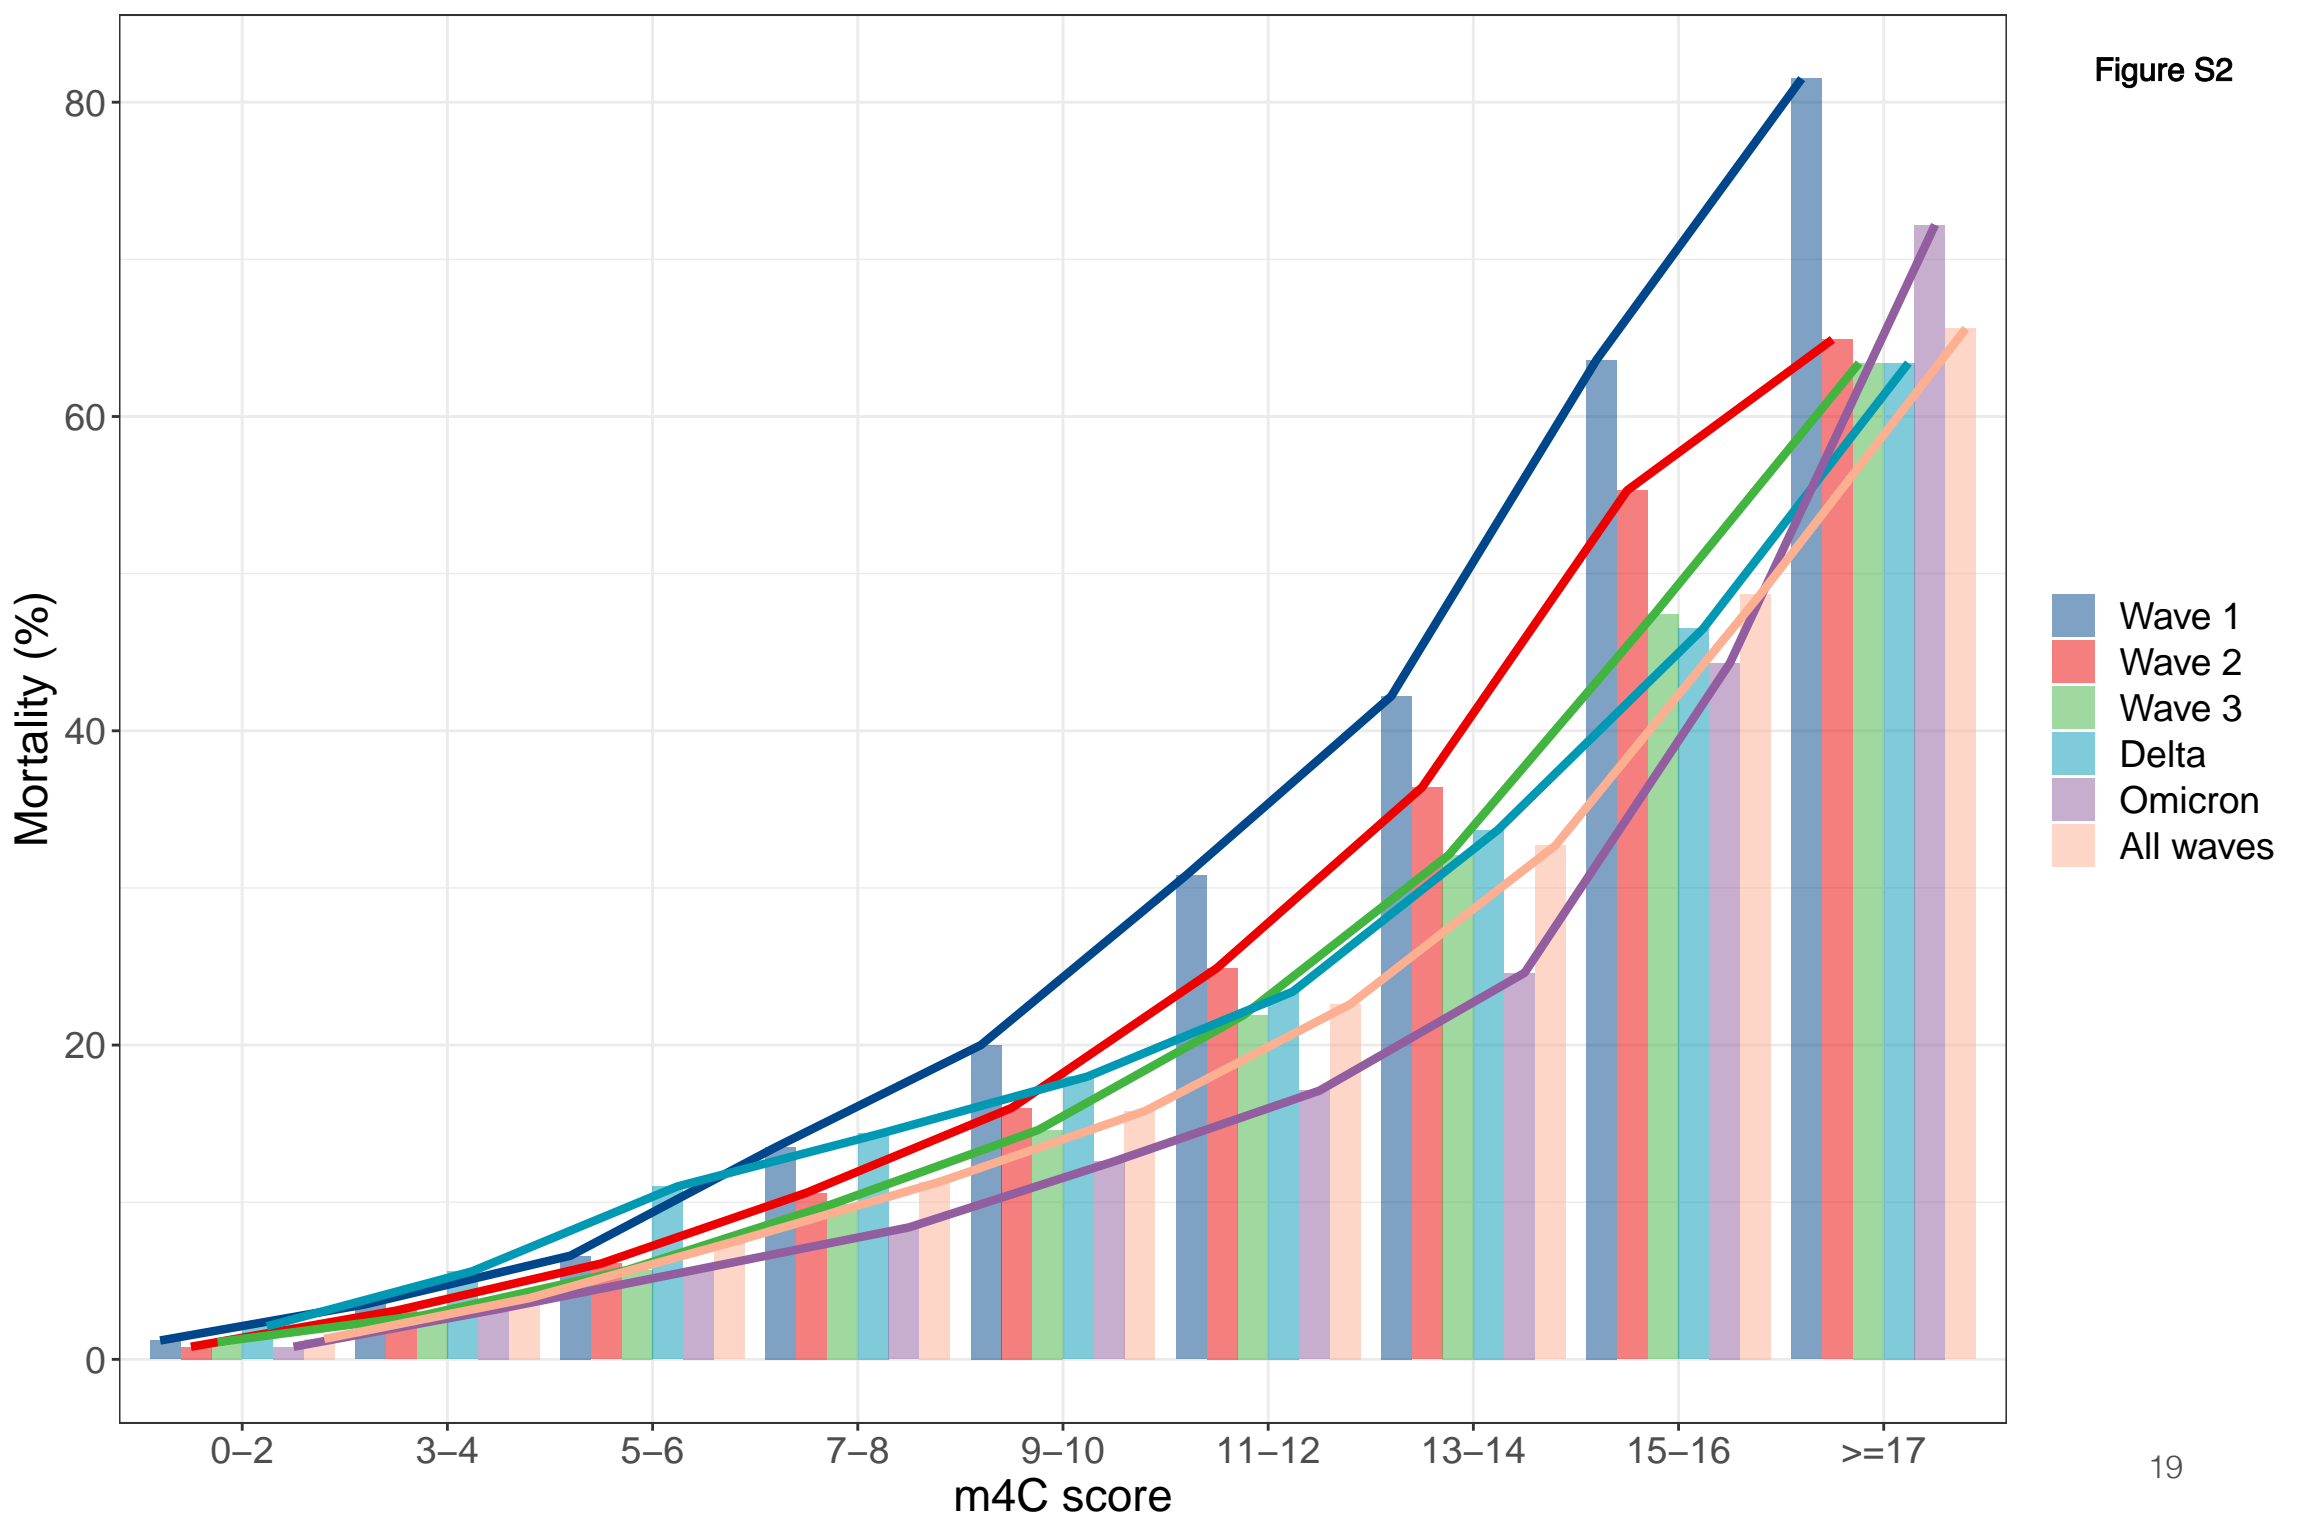

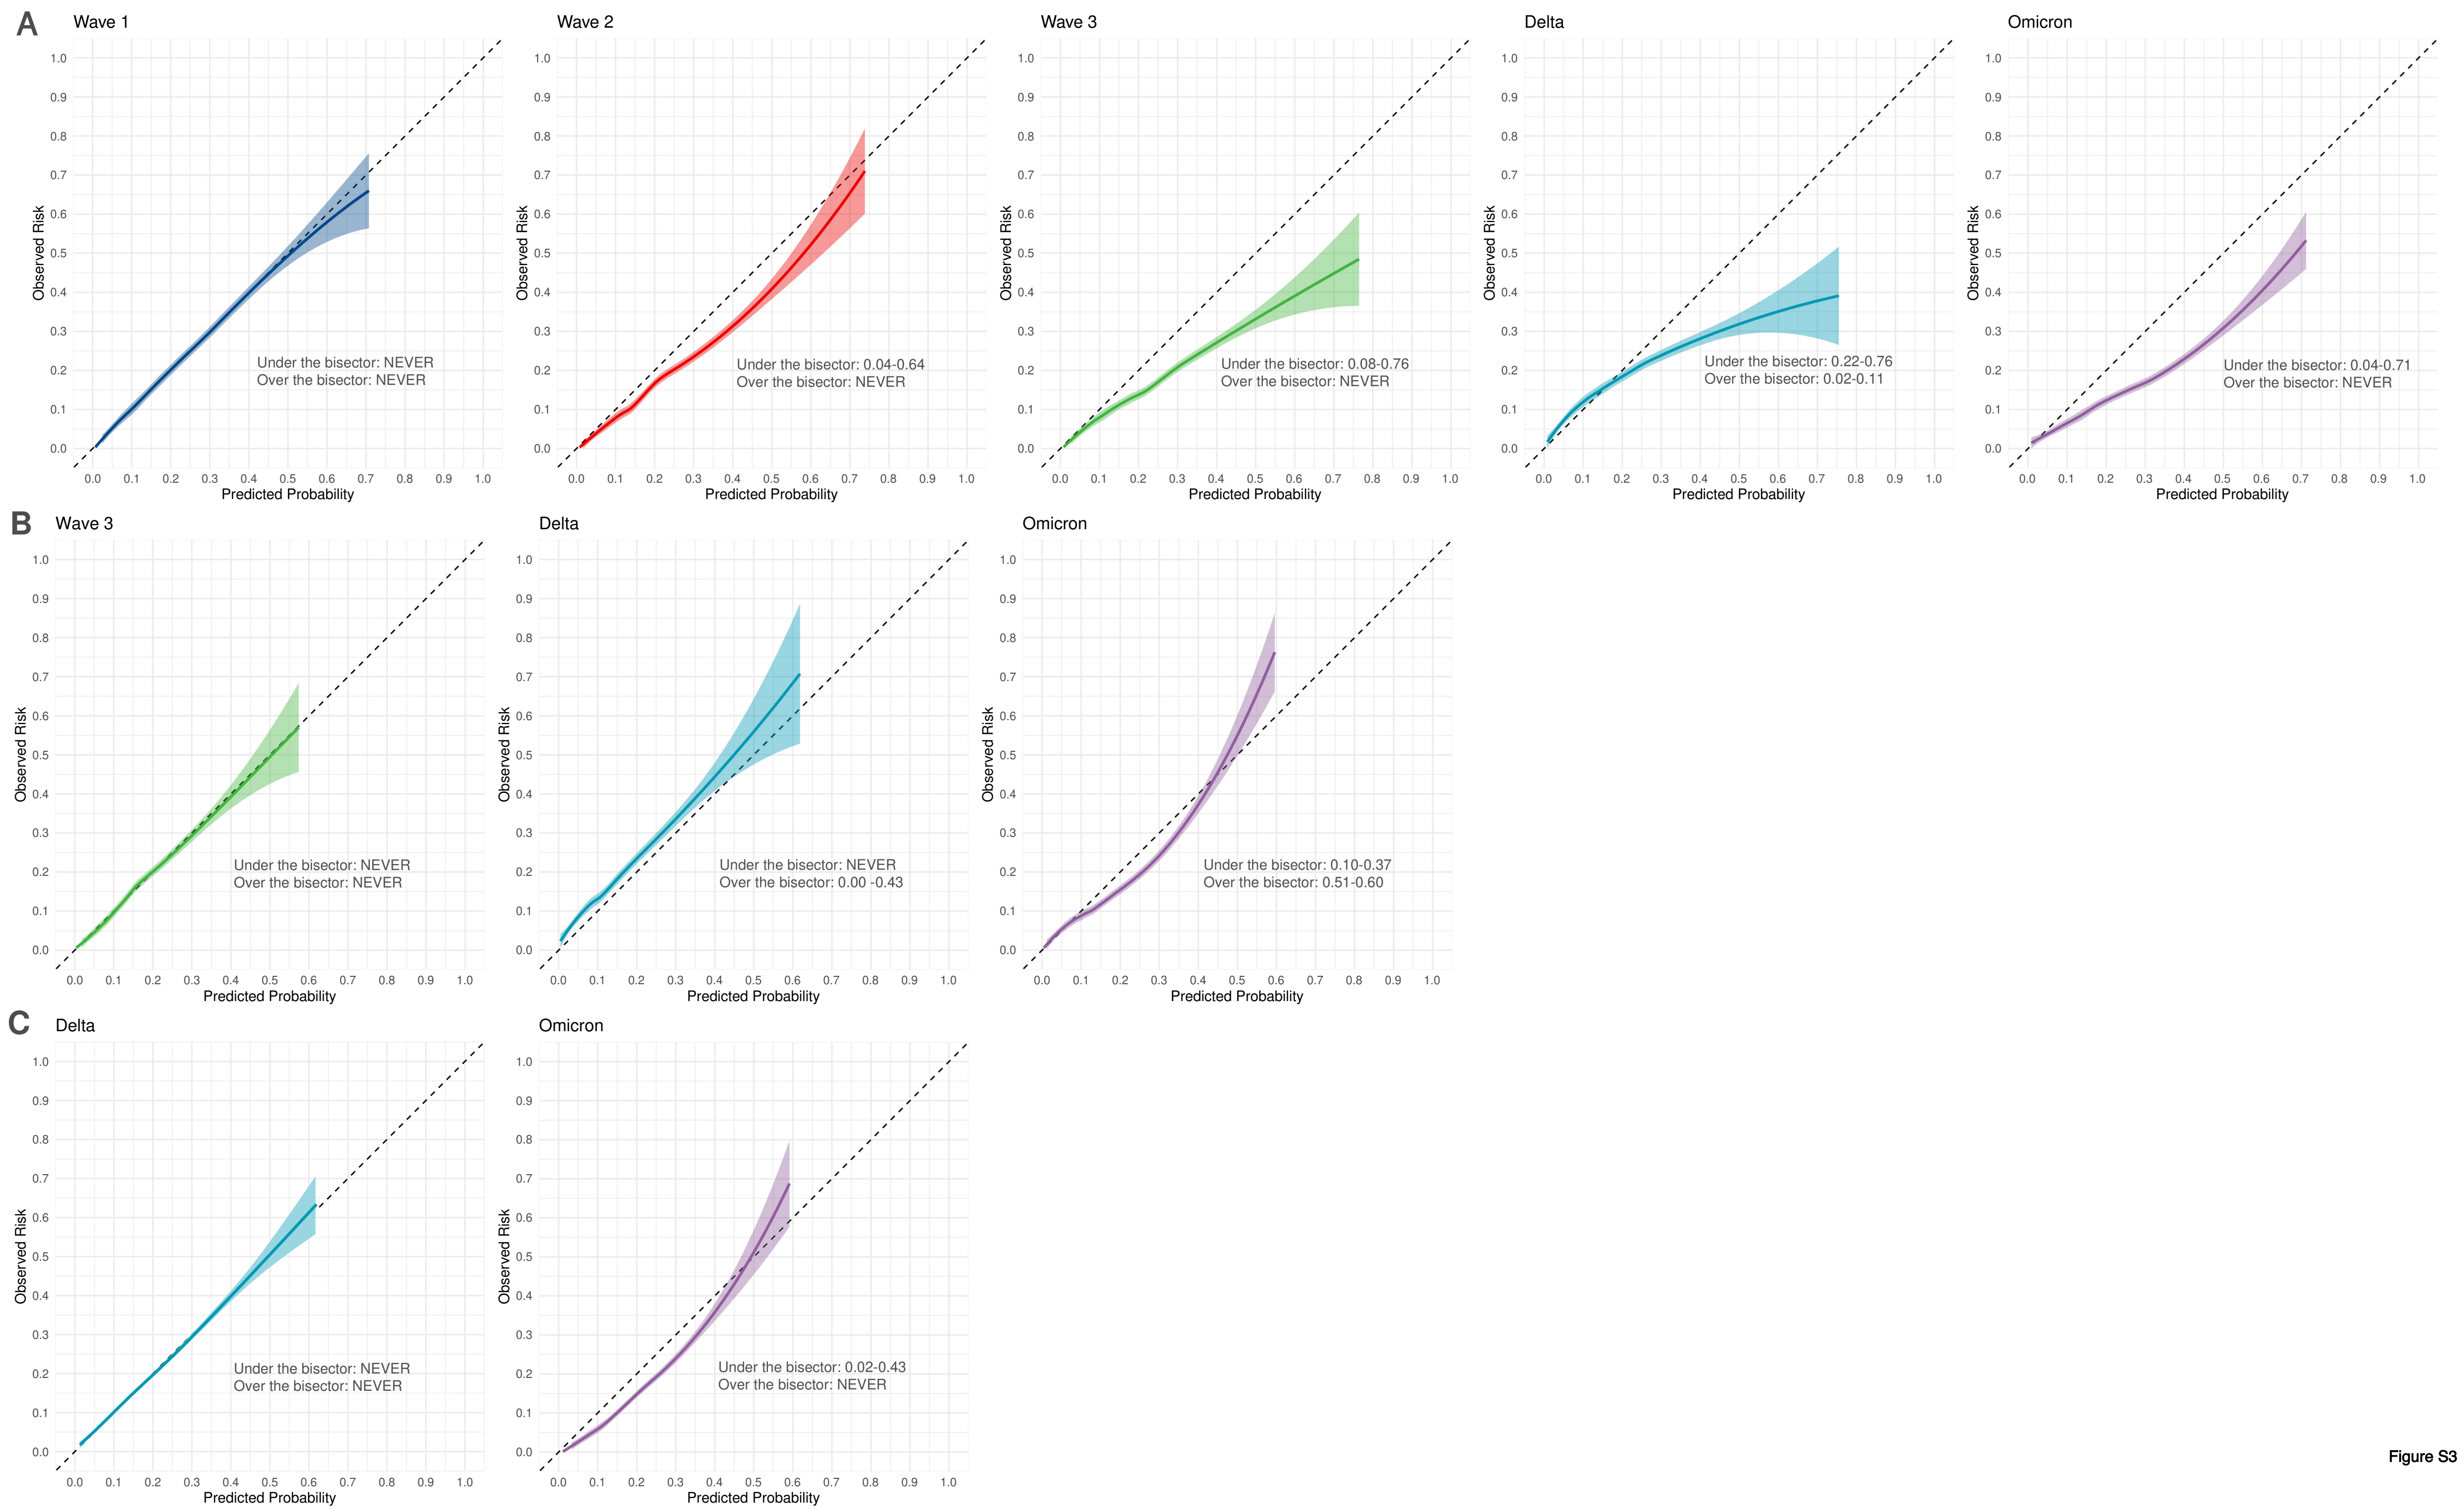

Figure S3

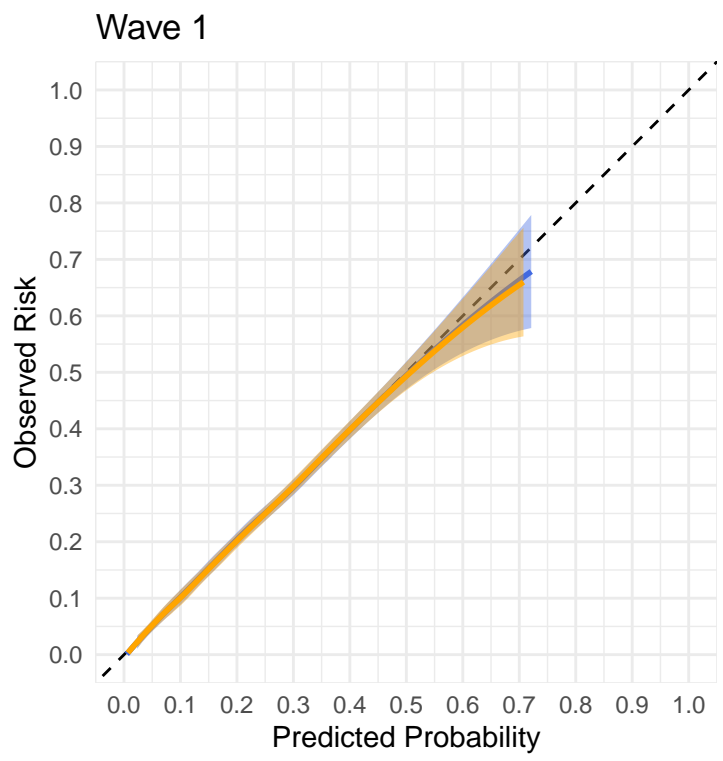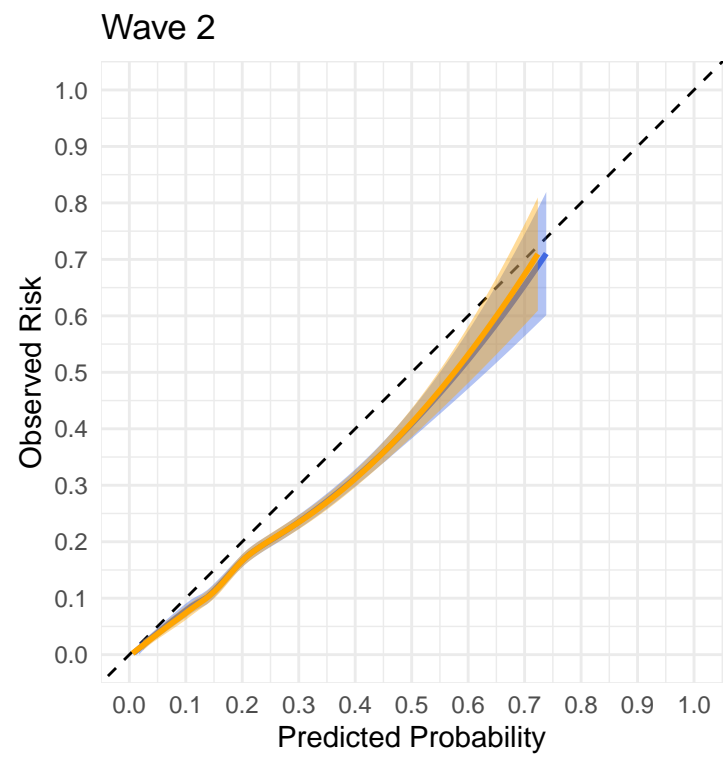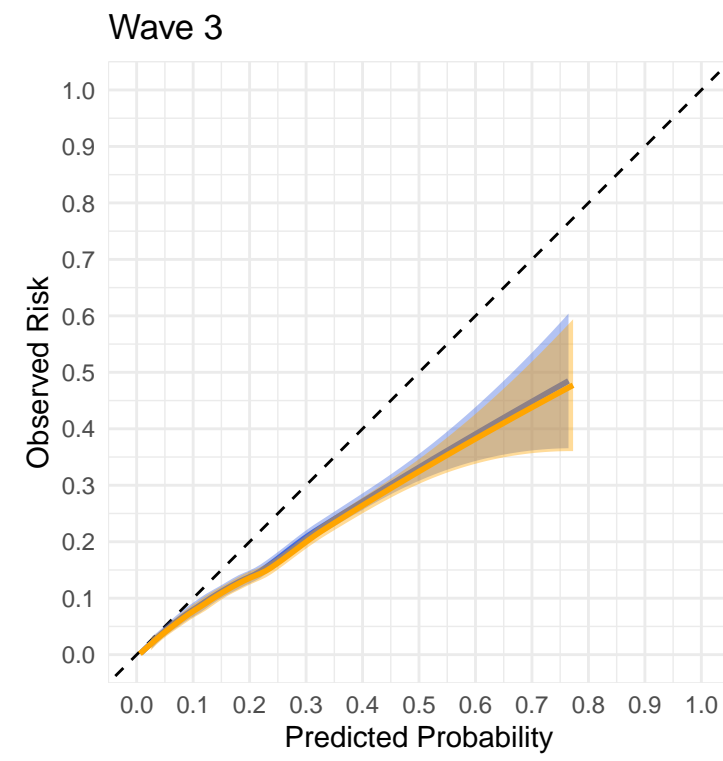

Models

- With Surge
- Without Surge

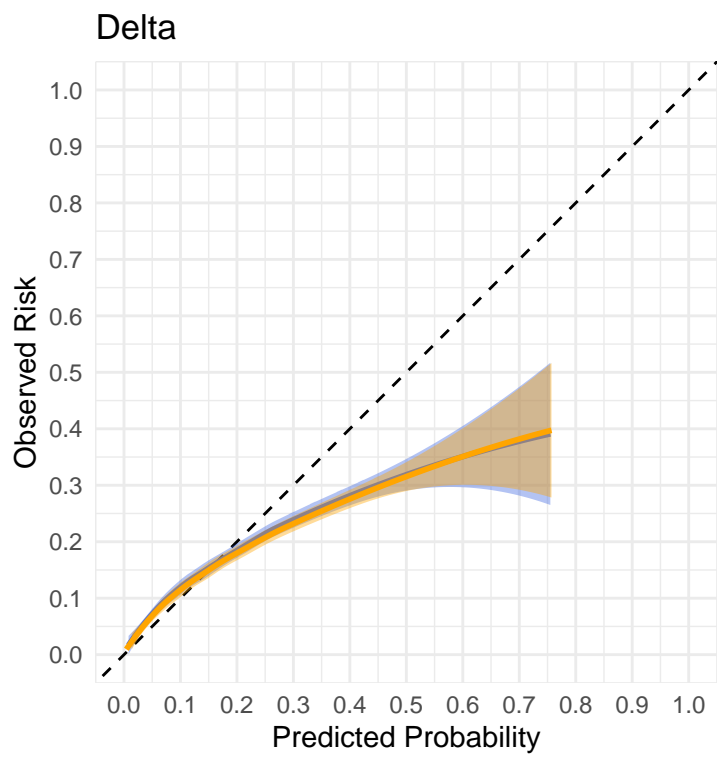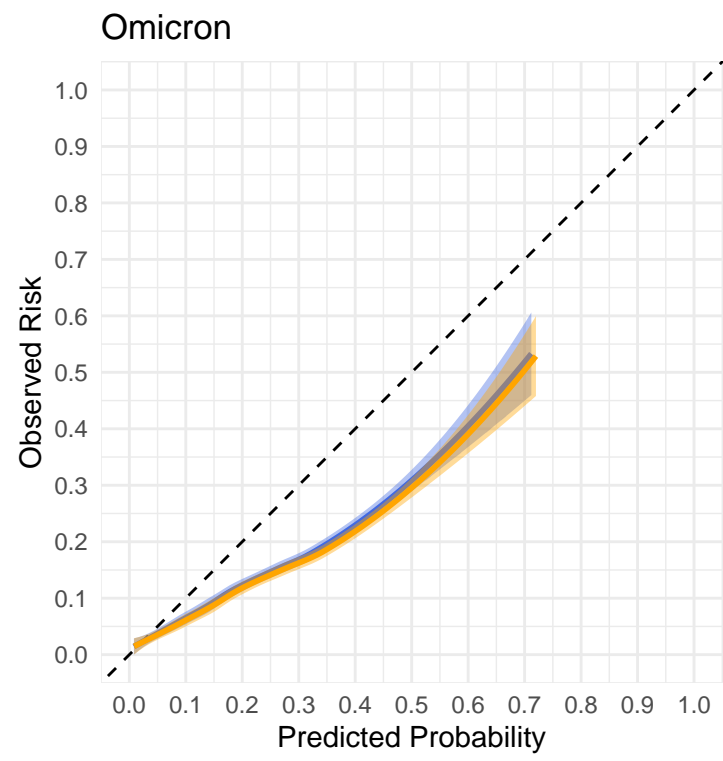

Supplement: cc9-5-e1021-s001.pdf [file cc9-5-e1021-s001.pdf]
